# Supplementary material for: Transcriptome analysis reveals mechanisms of geroprotective effects of fucoxanthin in Drosophila
Source: PubMed Central journal article supplement (PMC5836829; doi:10.1186/s12864-018-4471-x), 2018-02-09
Supplement: 12864_2018_4471_MOESM1_ESM.pdf [file 12864_2018_4471_MOESM1_ESM.pdf]

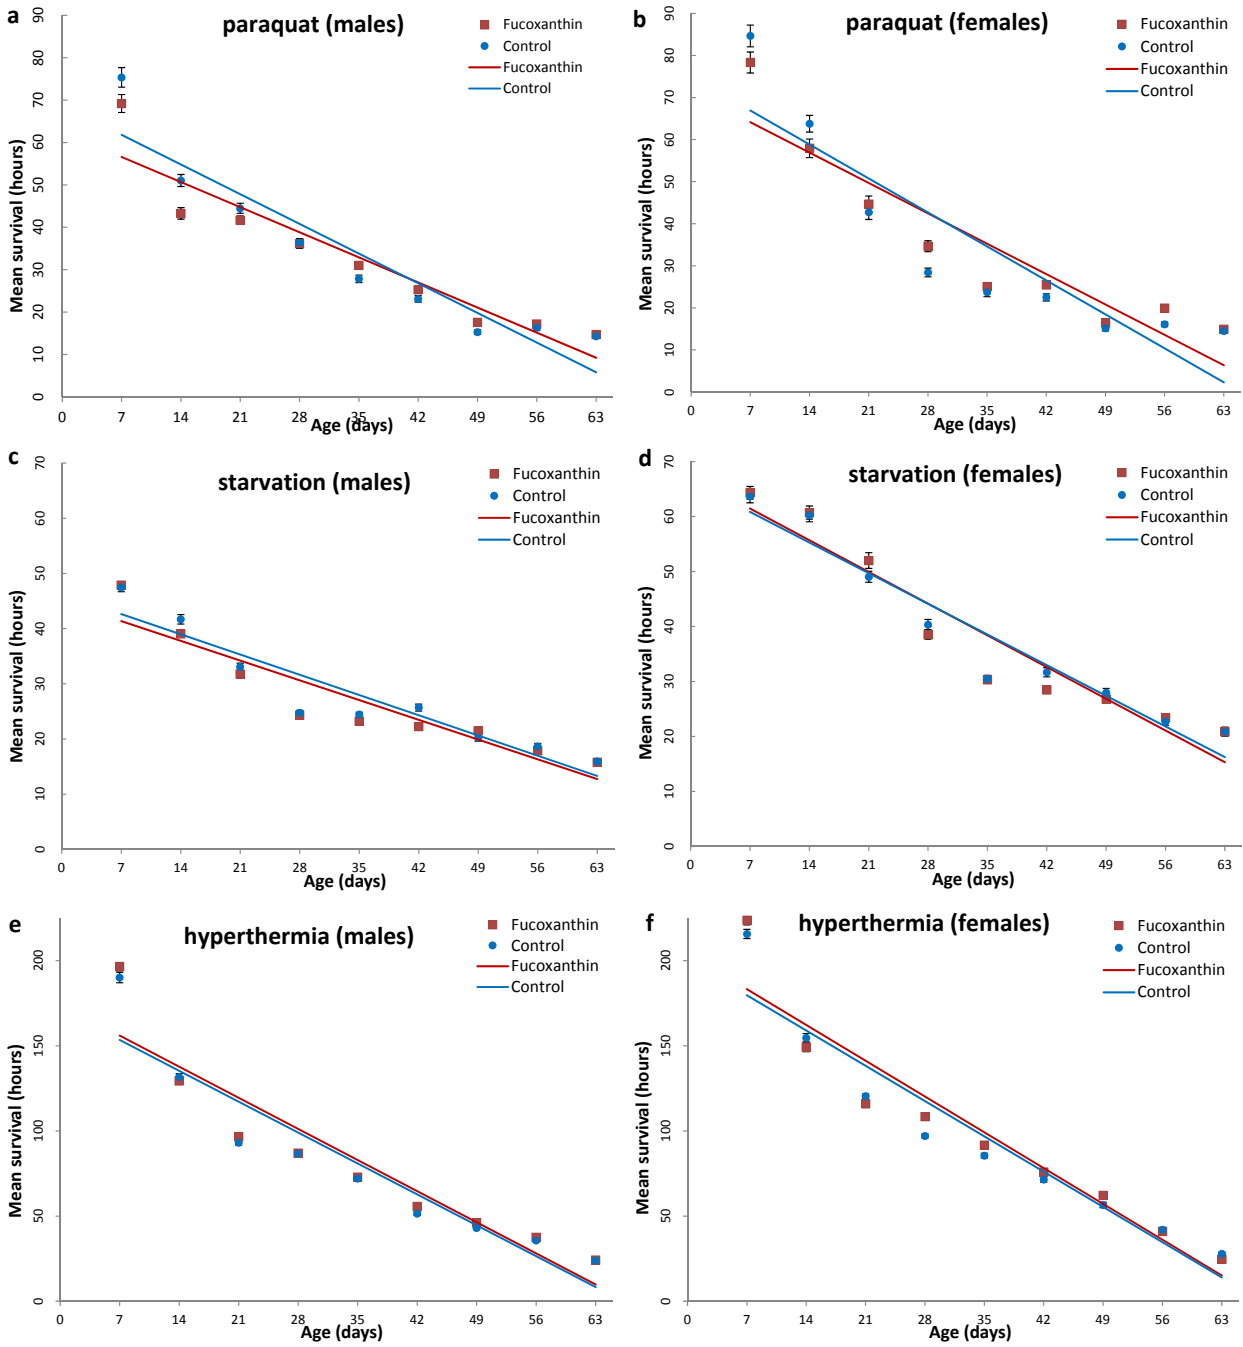

The scattering diagrams showing the dependence of survival on the age of *D. melanogaster* treated with fucoxanthin and control groups under the impact of various stress factors: paraquat (a – males; b – females), starvation (c – males; d – females), hyperthermia (e – males; f – females); color lines - linear regression
