# Supplementary material for: Transcriptome analysis reveals mechanisms of geroprotective effects of fucoxanthin in Drosophila
Source: PubMed Central journal article supplement (PMC5836829; doi:10.1186/s12864-018-4471-x), 2018-02-09
Supplement: 12864_2018_4471_MOESM6_ESM.pdf [file 12864_2018_4471_MOESM6_ESM.pdf]

LYSINE DEGRADATION

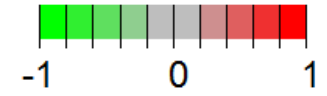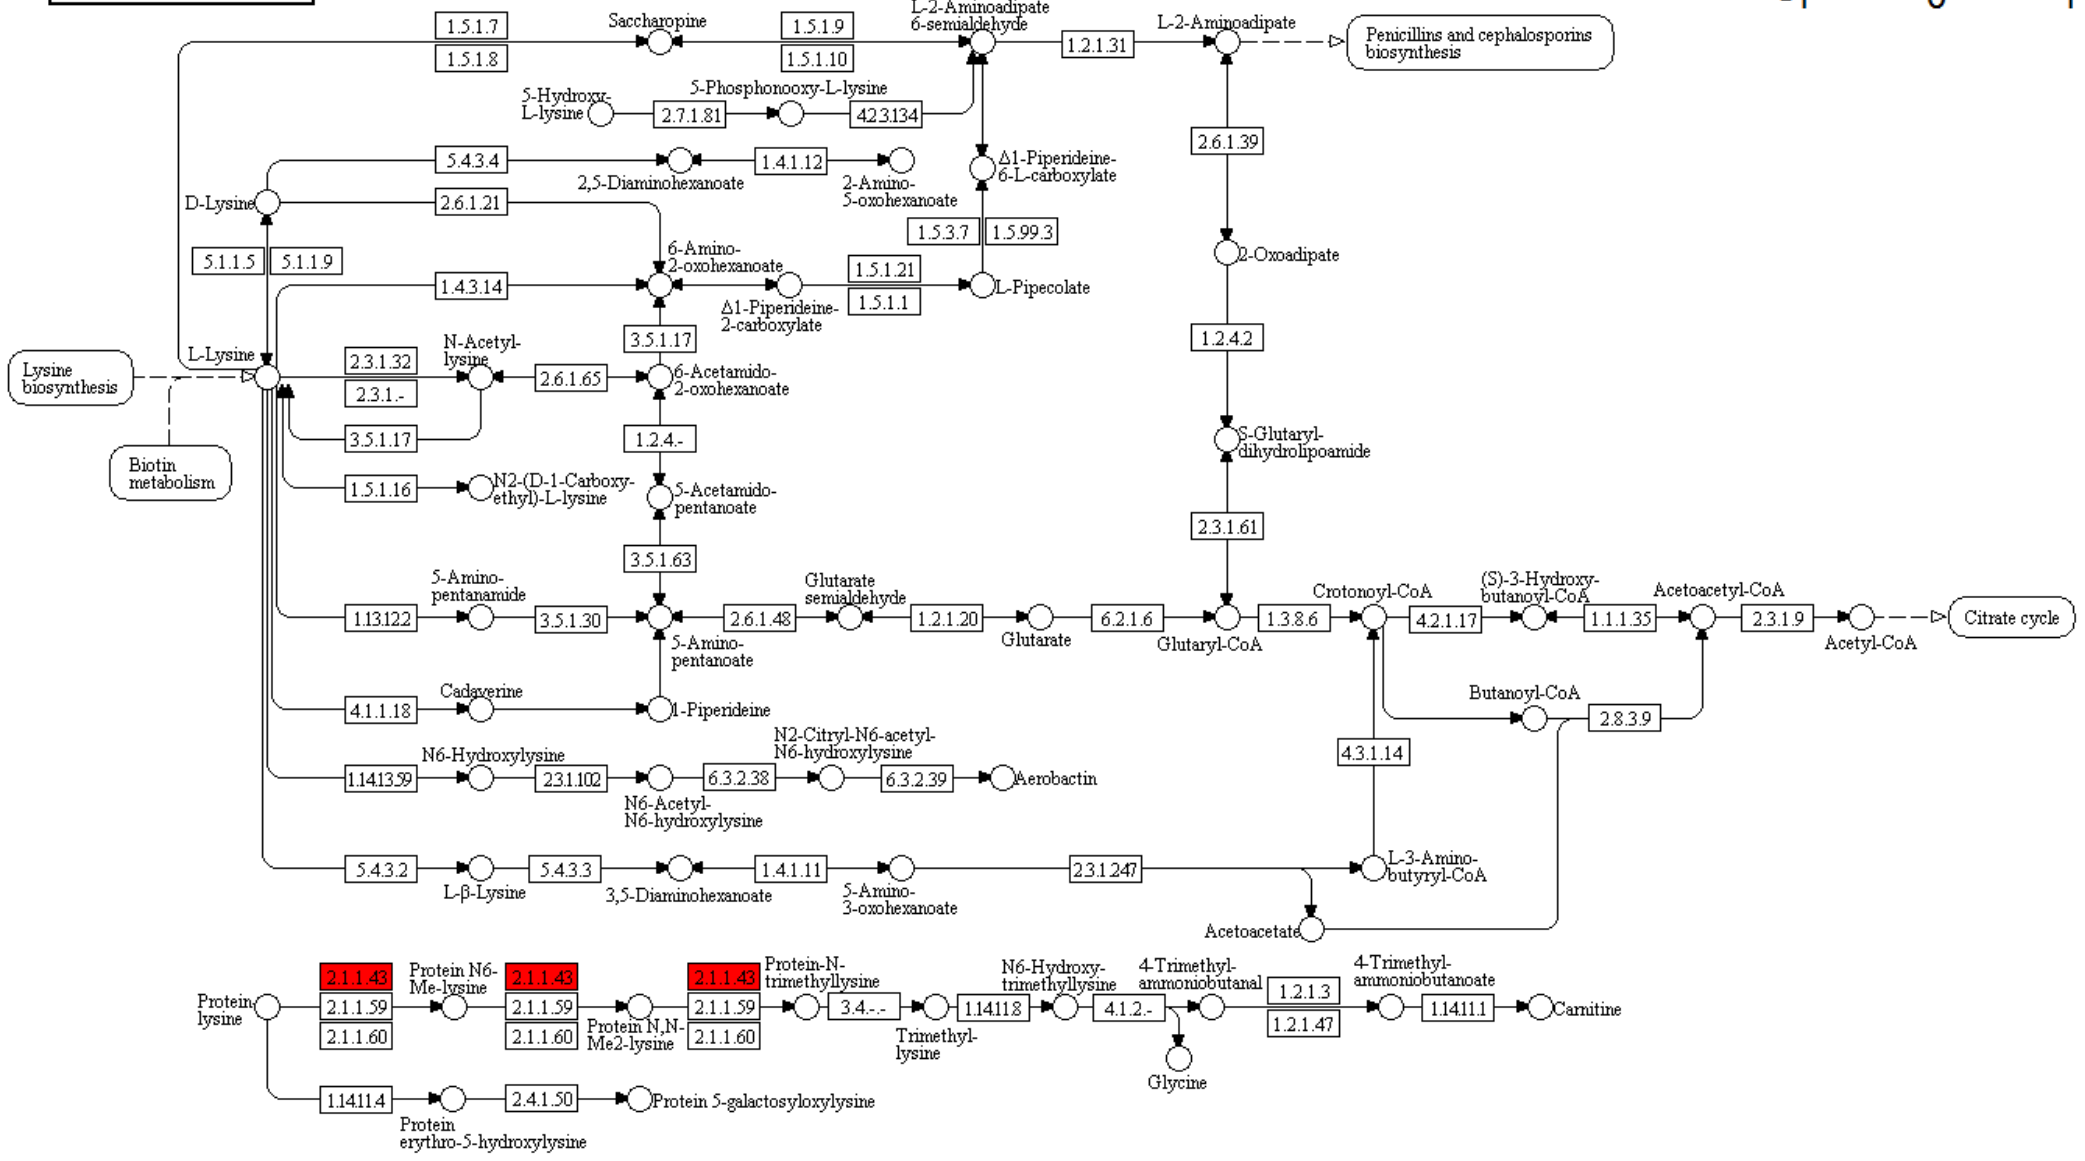

Data on KEGG graph  
Rendered by Pathview

**mRNA SURVEILLANCE PATHWAY**

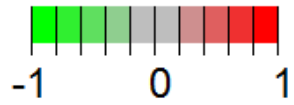

- Cap binding complex (CBC)**
- CBP80
  - CBP20
- Exon-junction complex (EJC)**
- |       |        |       |         |
|-------|--------|-------|---------|
| Upf3  |        |       | ACIN1   |
| Y14   | MLN51  | SAP18 | RNPS1   |
| MAGOH | EIF4A3 | Pimin | Ref/Aly |
- Transiently interacting factors**
- |     |       |        |
|-----|-------|--------|
| Tap | UAP56 | SRm160 |
| p15 | PYM   |        |

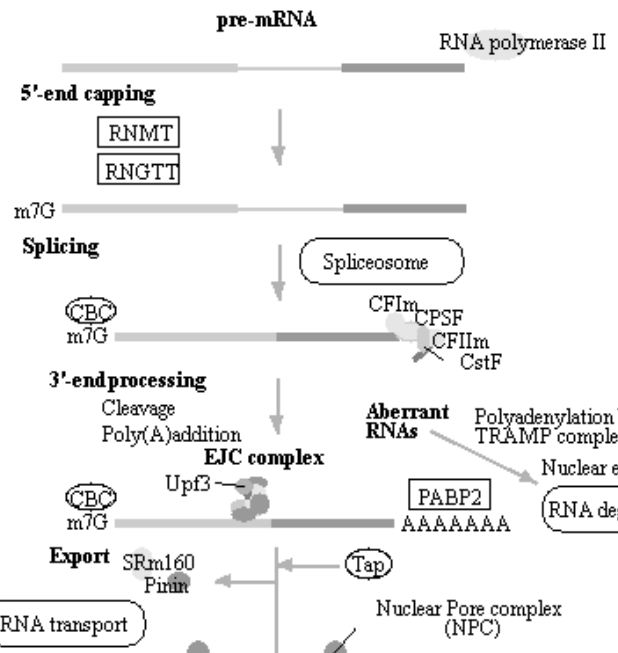

- pre-mRNA 3'-end processing machinery**
- Cleavage factor Im (CFIm) complex**
- CPSF5
  - CPSF6/7
  - PAP
- Cleavage factor IIm (CFIIm) complex**
- Clp1
  - Pcf11
- Cleavage and polyadenylation specificity factor (CPSF) complex (Saccharomyces cerevisiae)**
- |       |       |       |      |       |
|-------|-------|-------|------|-------|
| CPSF1 | CPSF2 | CPSF3 | MPE1 | PSF2  |
| Fip1  | CPSF4 |       | SWD2 | REF2  |
|       |       |       | GLC7 | SSU72 |
- Cleavage stimulation factor (CSTF) complex**
- CSTF1
  - CSTF2
  - CSTF3
  - SYMPK

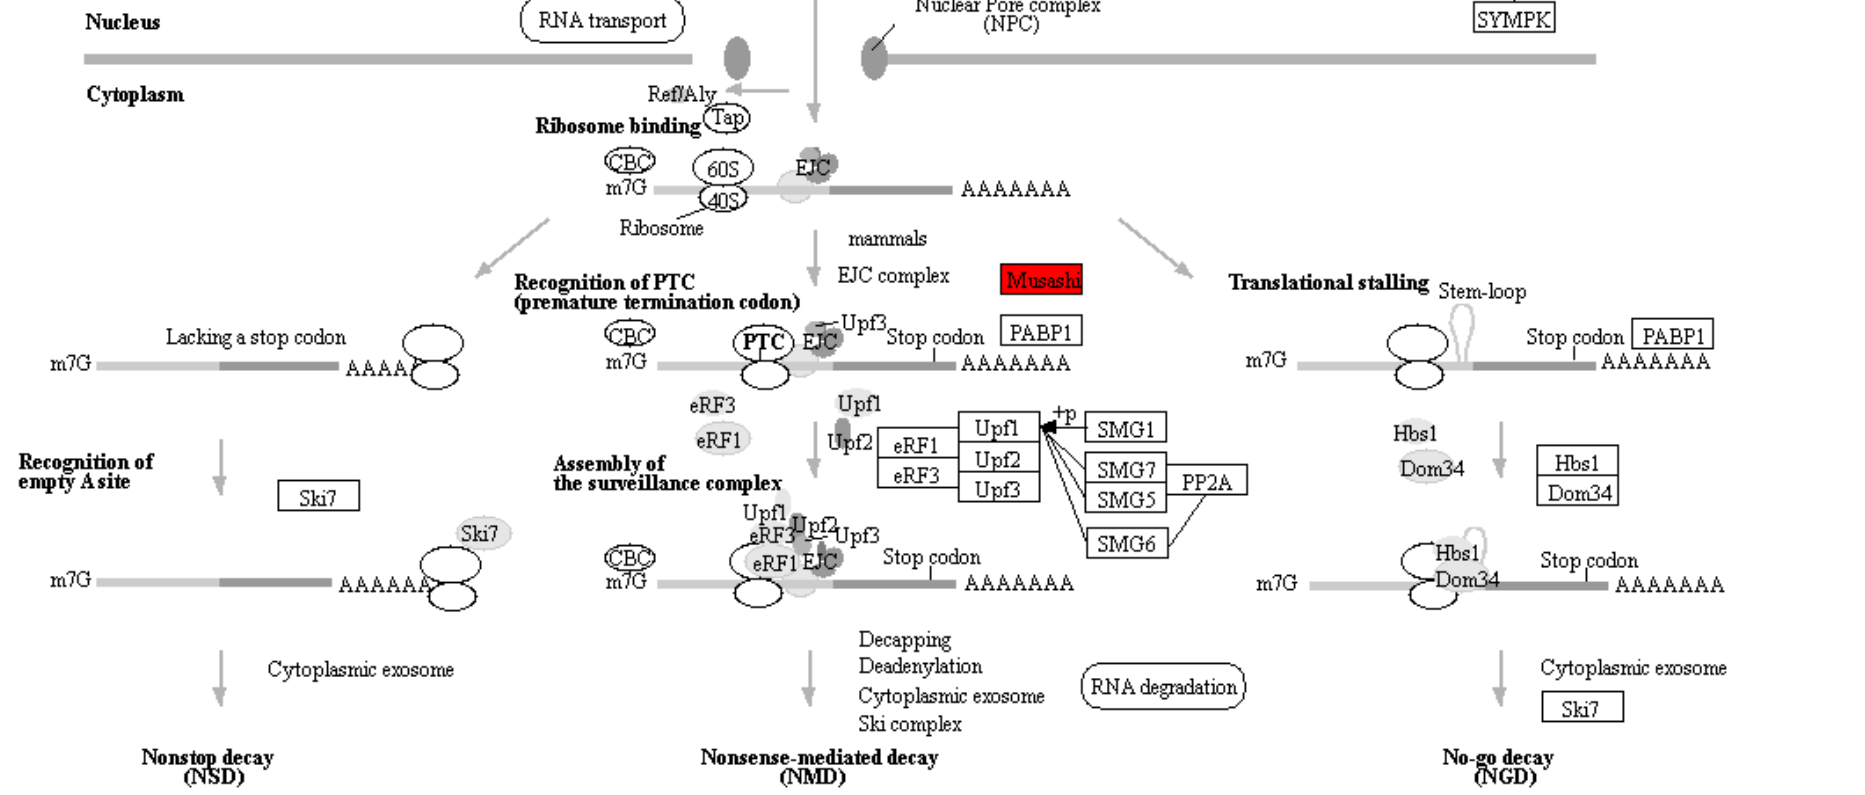

**Nonstop decay (NSD)**

**Nonsense-mediated decay (NMD)**

**No-go decay (NGD)**

**SPLICEOSOME**

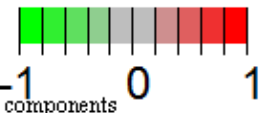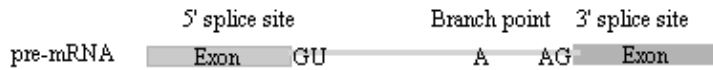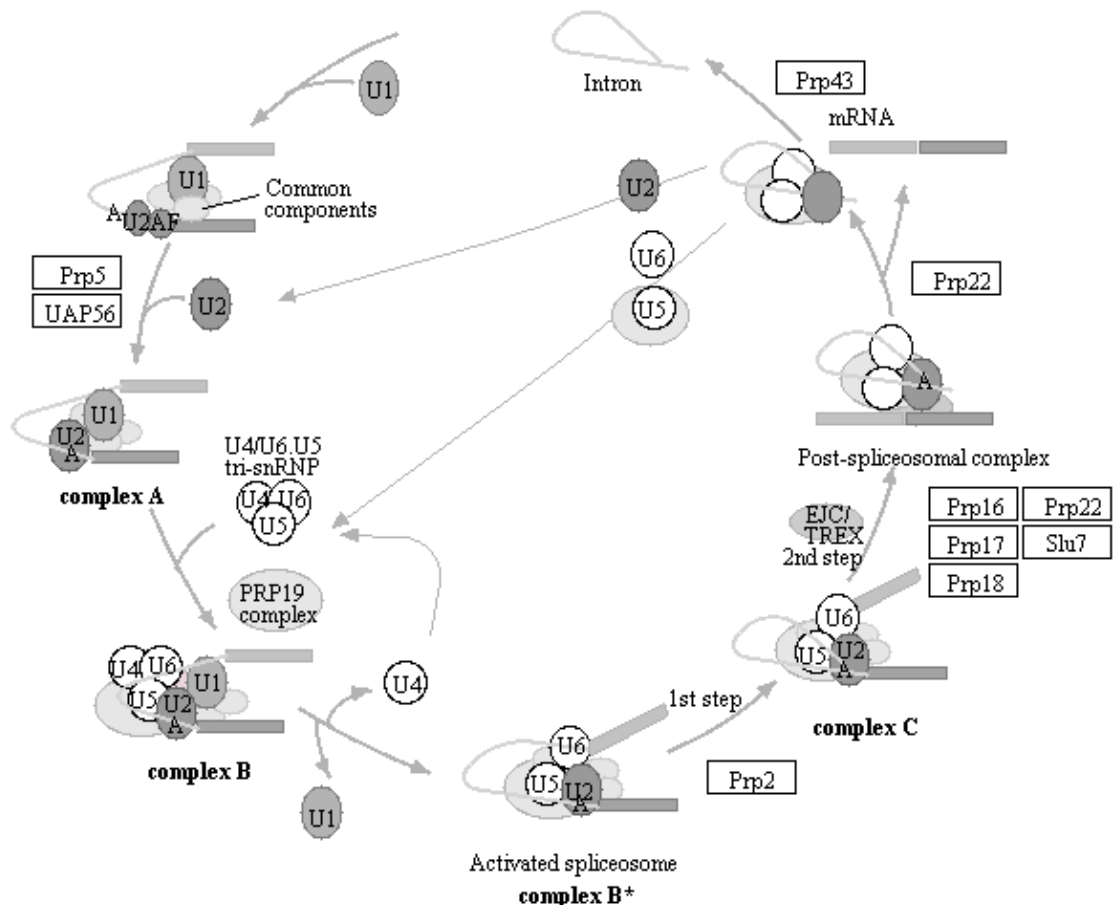

| U1         | U2                            | U4/U6    | U5                |
|------------|-------------------------------|----------|-------------------|
| U1snRNA    | U2snRNA                       | U4snRNA  | U5snRNA           |
| Sm         | Sm                            | U6snRNA  | Sm                |
| U1-70K     | U2A'                          | Lsm      | Snul14            |
| U1A        | U2B''                         | Sm       | Brr2              |
| U1C        | SF3a                          | Prp3     | Prp6              |
| U1 related | SF3b                          | Prp4     | Prp8              |
| FBP11      | U2 related                    | CypH     | Prp8BP            |
| S164       | U2AF                          | Prp31    | Prp28             |
| p68        | PUF60                         | Snul3    | DIB1              |
| CA150      | U4/U6.U5 tri-snRNP associated | SnRNP27  |                   |
|            | SPF30                         | Sad1     |                   |
|            | SPF45                         | Snu66    |                   |
|            | CHERP                         |          |                   |
|            | SR140                         |          |                   |
|            | Prp43                         | Snu23    |                   |
|            | PAP-1                         | Prp38    |                   |
|            |                               | PAP-1    |                   |
|            | Prp19 complex                 | EJC/TREX | Common components |
|            | Prp19                         | SKIP     | CBP80/20          |
|            | CDC5                          | Syf      | hnRNPs            |
|            | SPF27                         | Isy1     | SR                |
|            | PRL1                          | PPIL1    |                   |
|            | AD002                         | CypE     |                   |
|            | CTNNE1                        | CCDC12   |                   |
|            | <b>HSP73</b>                  | RBM22    |                   |
|            | Complex B specific            | G10      |                   |
|            | NPW38                         | AQR      |                   |
|            | NPW38BP                       |          |                   |

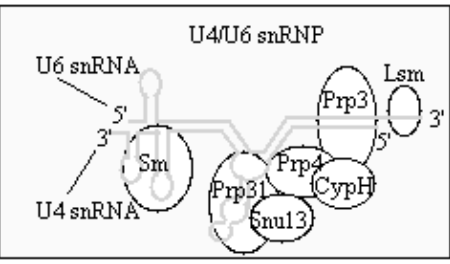

Data on KEGG graph  
Rendered by Pathview

MAPK SIGNALING PATHWAY - FLY

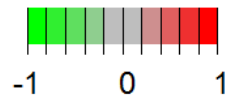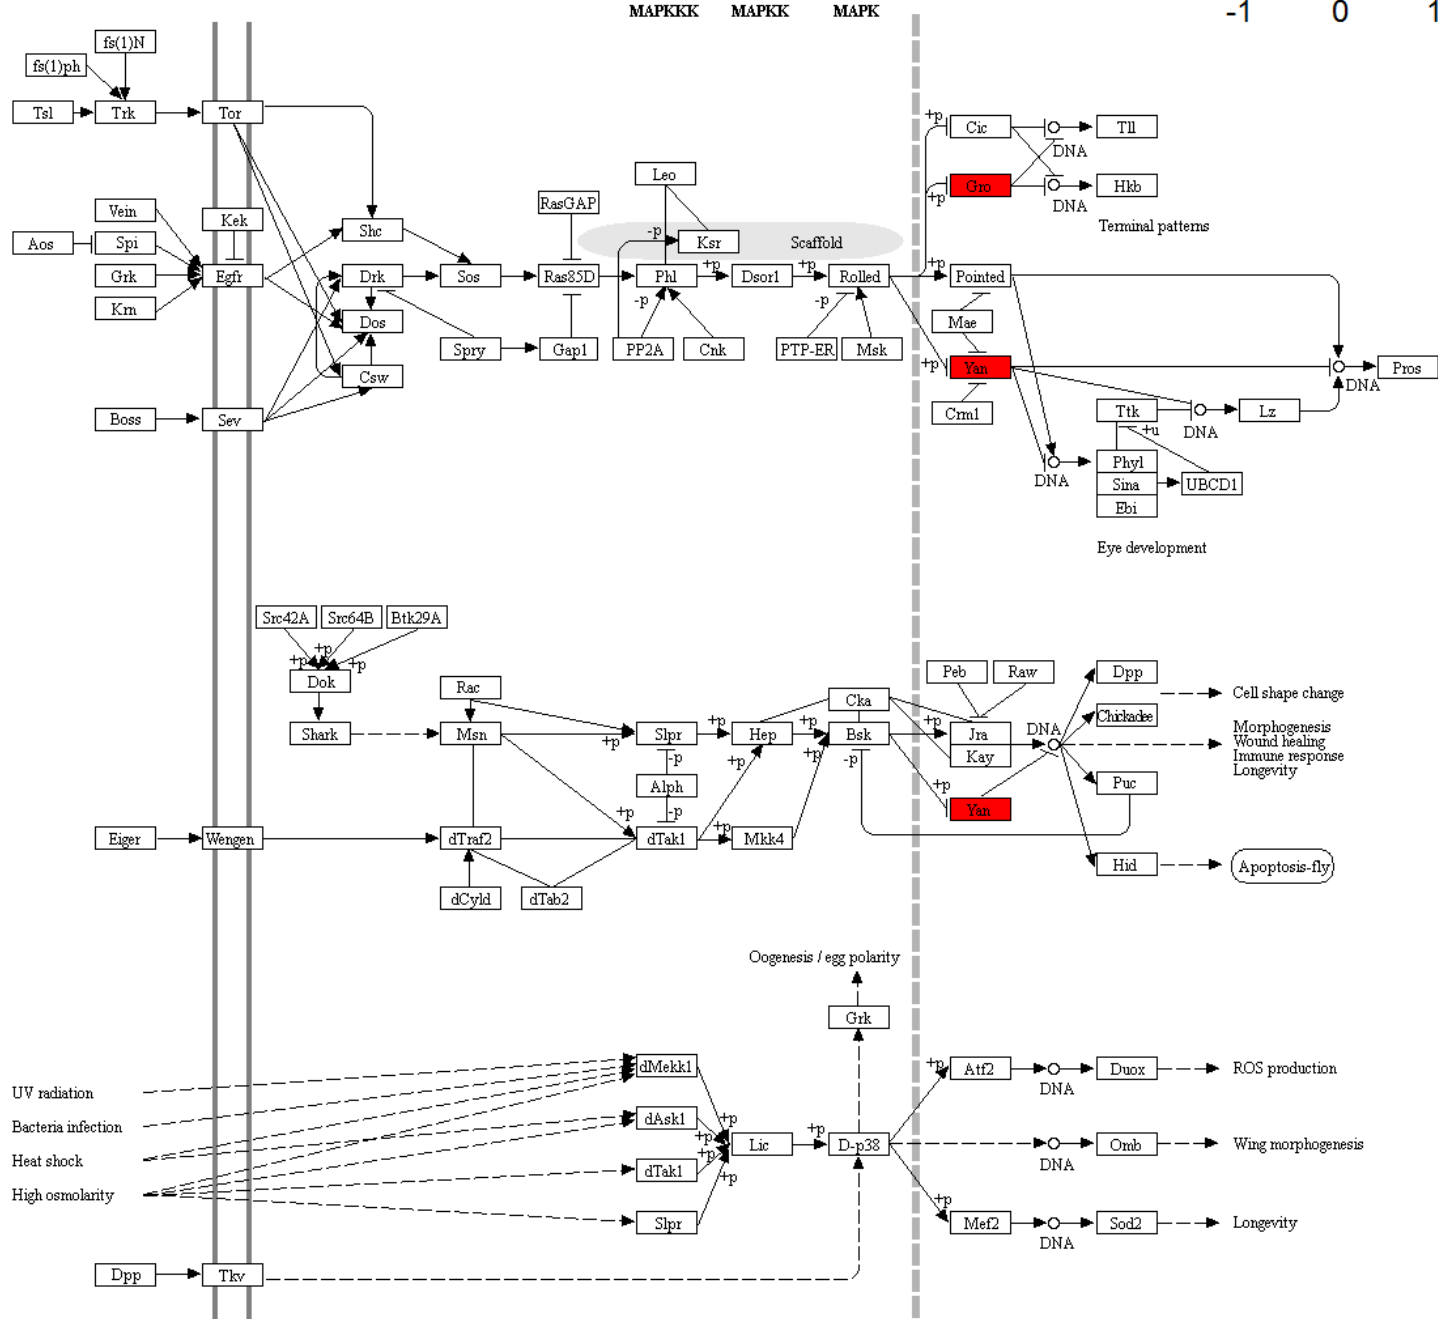

Data on KEGG graph  
Rendered by Pathview ;

UBIQUITIN MEDIATED PROTEOLYSIS

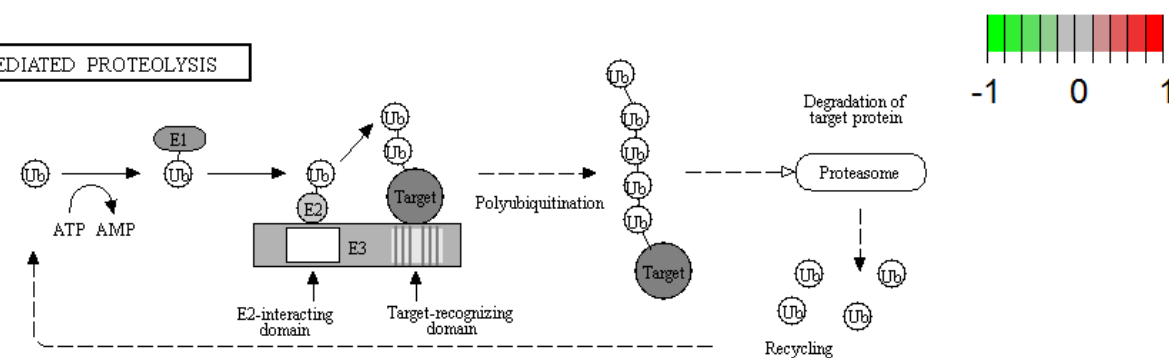

- E1**  
(Ubiquitin-activating enzyme)
- |      |        |        |       |
|------|--------|--------|-------|
| UBE1 | UBLE1A | UBLE1B | UBE1C |
|------|--------|--------|-------|

- E2**  
(Ubiquitin-conjugating enzyme)
- |       |        |        |        |        |       |        |        |       |
|-------|--------|--------|--------|--------|-------|--------|--------|-------|
| UBE2A | UBE2B  | UBE2C  | UBE2D  | UBE2E  | UBE2F | UBE2G1 | UBE2G2 | UBE2H |
| UBE2I | UBE2J1 | UBE2J2 | UBE2L3 | UBE2L6 | UBE2M | UBE2N  | UBE2O  |       |
| UBE2Q | UBE2R  | UBE2S  | UBE2U  | UBE2W  | UBE2Z | HIP2   | APCLCN |       |

- E3**  
(Ubiquitin ligase)
- HECT type E3**
- 
- |      |       |        |       |         |
|------|-------|--------|-------|---------|
| E6AP | UBE3B | UBE3C  | Smurf | Itch    |
| WWP1 | WWP2  | TRIP12 | NEDD4 | ARF-BP1 |
| EDD1 | HERC1 | HERC2  | HERC3 | HERC4   |

- U-box type E3**
- 
- |       |       |      |
|-------|-------|------|
| UBE4A | UBE4B | CHIP |
| CYC4  | PRP19 | UIP5 |

- single RING-finger type E3**
- 
- |       |       |        |        |        |        |       |
|-------|-------|--------|--------|--------|--------|-------|
| Mdm2  | CBL   | Parkin | SIAH-1 | PML    | TRAF6  | MEKK1 |
| COP1  | PIRH2 | cIAPs  | PIAS   | SYVN   | NHLRC1 | AIRE  |
| MGRN1 | BRCA1 | FANCL  | MID1   | Trim32 | Trim37 |       |

multi subunit RING-finger type E3

- Cullin-Rbx E3**
- 
- |              | RING finger | Cullin | Adaptor protein | Target recognizing subunit |
|--------------|-------------|--------|-----------------|----------------------------|
| SCF complex  | RBX1        | Cul1   | Skp1            | F-box                      |
| ECV complex  | RBX1        | Cul2   | EloB<br>EloC    | VHLbox                     |
| Cul3 complex | RBX1        | Cul3   |                 | BTB                        |
| Cul4 complex | RBX1        | Cul4   | DDB1            | DCAF                       |
| ECS complex  | RBX2        | Cul5   | EloB<br>EloC    | SOC3box                    |
| Cul7 complex | RBX1        | Cul7   | Skp1            | Fbxw8                      |

- APC/C**
- 
- | RING finger | Cullin | Adaptor protein | Target recognizing subunit | Other subunits |
|-------------|--------|-----------------|----------------------------|----------------|
| Apc11       | Apc2   | ?               | Cdc20                      | Apc1, Apc3     |
|             |        |                 | Cdh1                       | Apc4, Apc5     |
|             |        |                 |                            | Apc6, Apc7     |
|             |        |                 |                            | Apc8, Apc9     |
|             |        |                 |                            | Apc10, Apc12   |
|             |        |                 |                            | Apc13          |

Data on KEGG graph  
Rendered by Pathview ;

AUTOPHAGY - OTHER

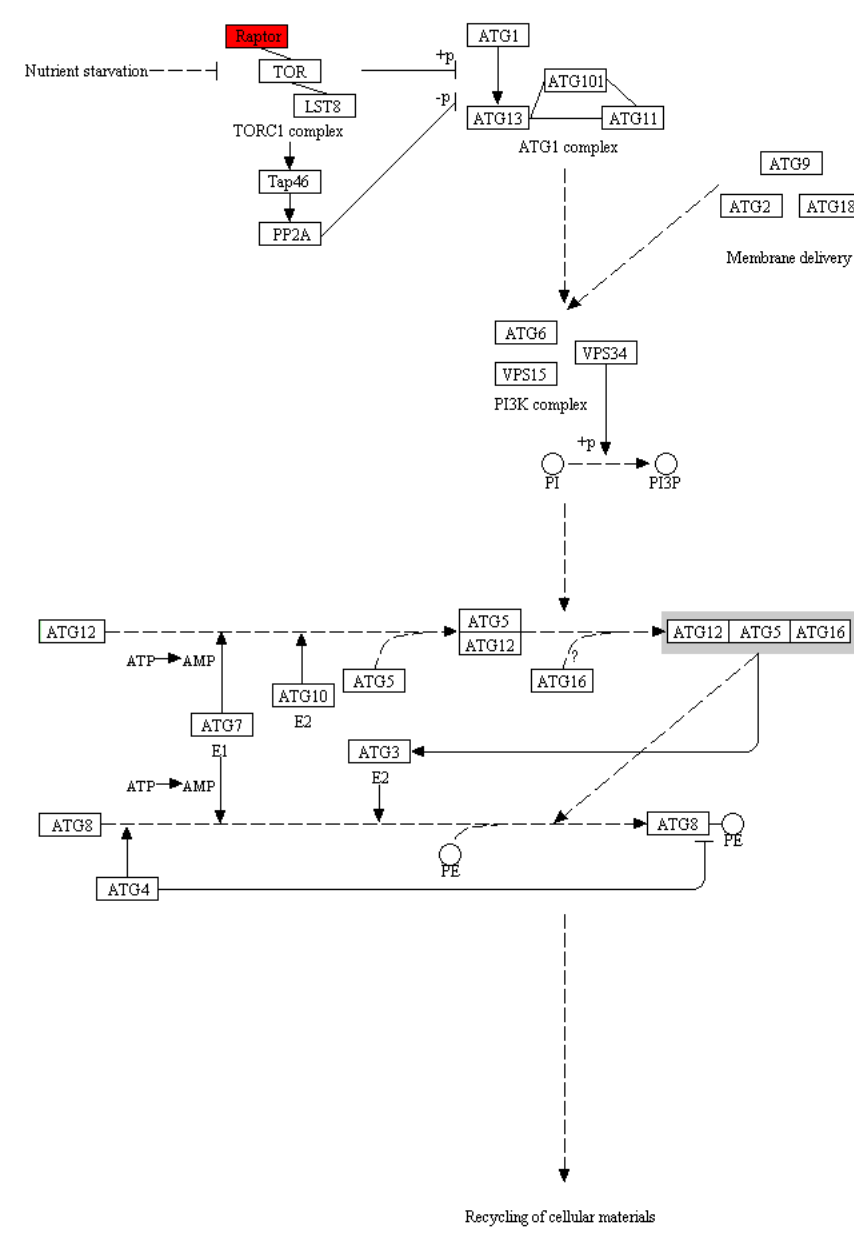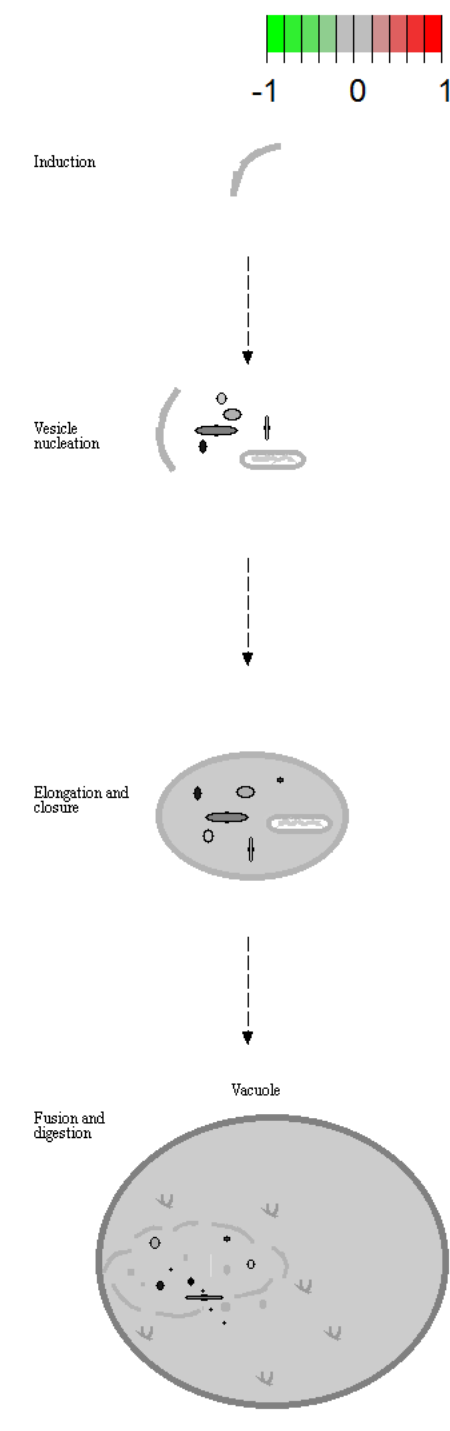

AUTOPHAGY - ANIMAL

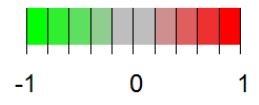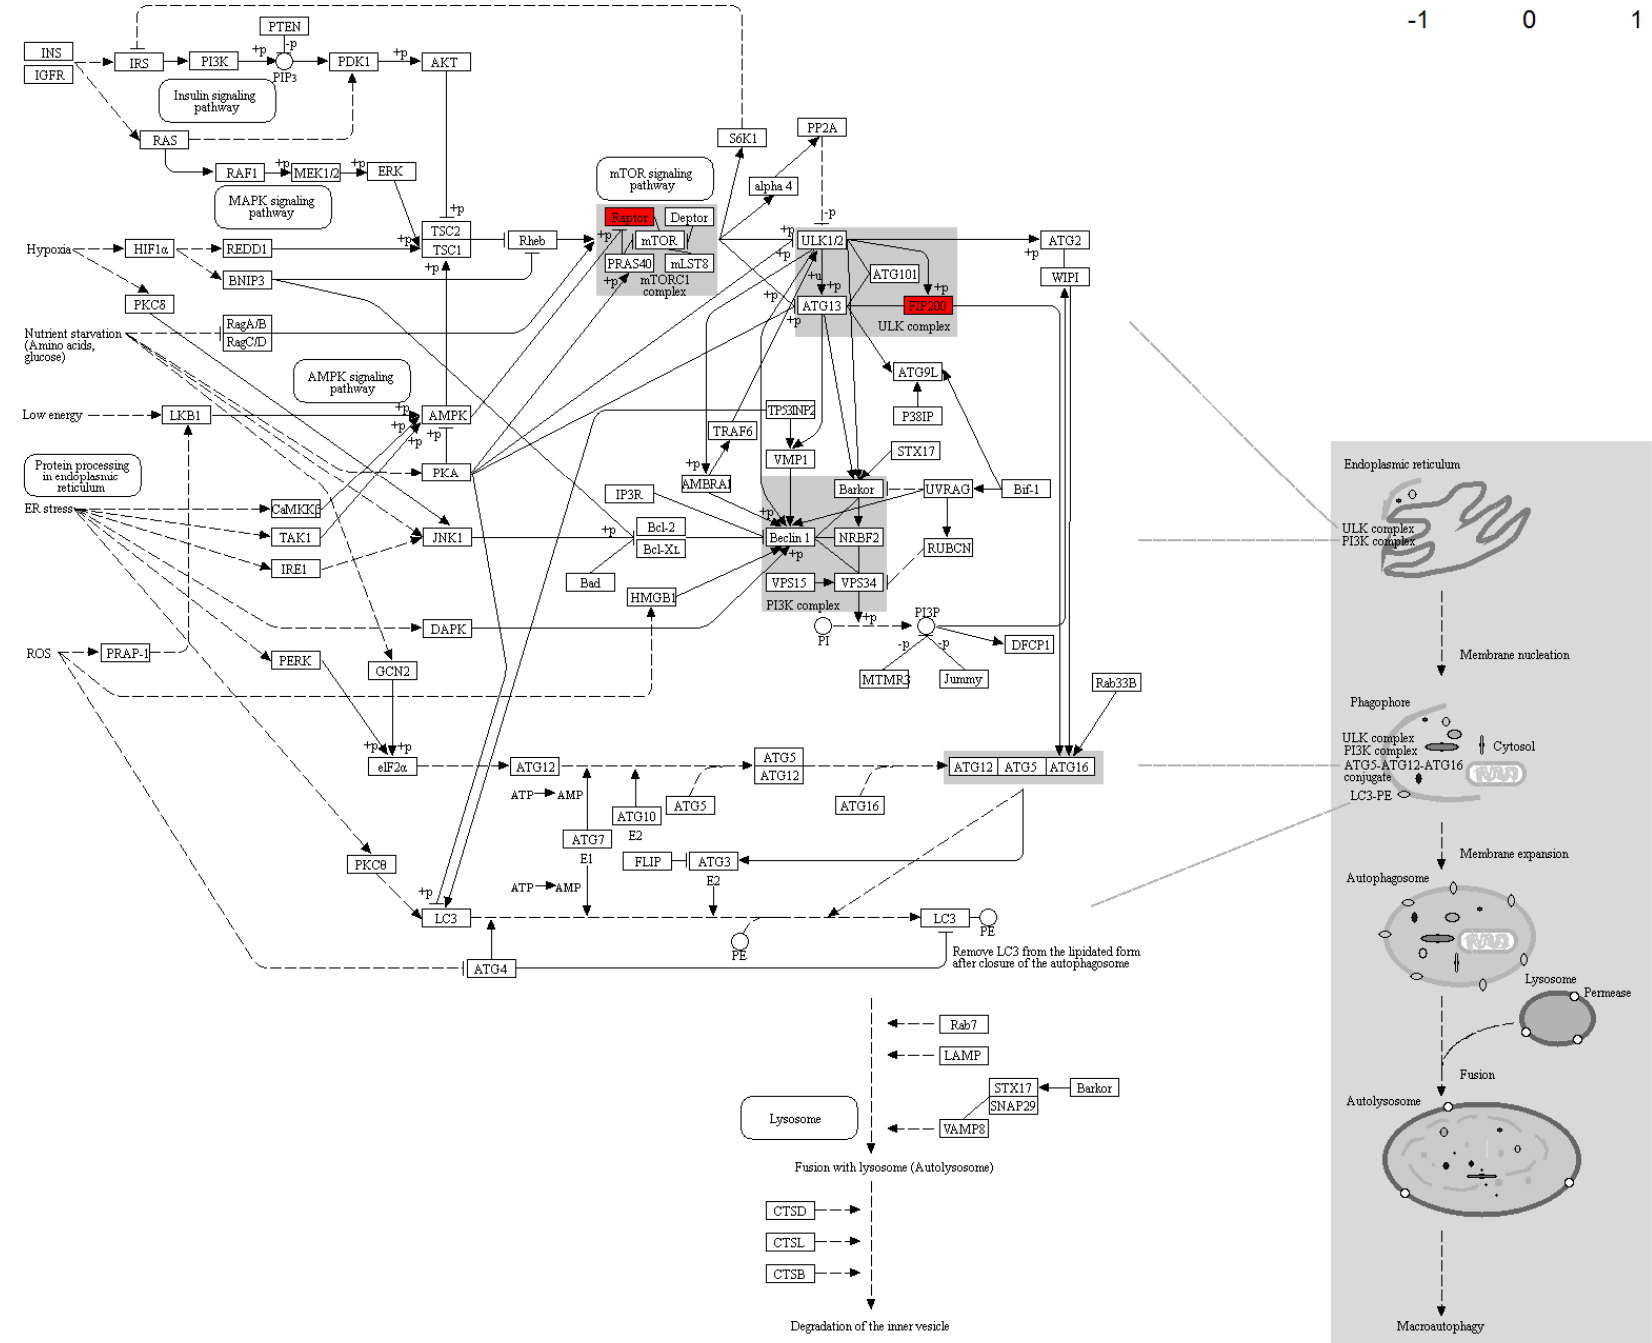

Data on KEGG graph  
Rendered by Pathview

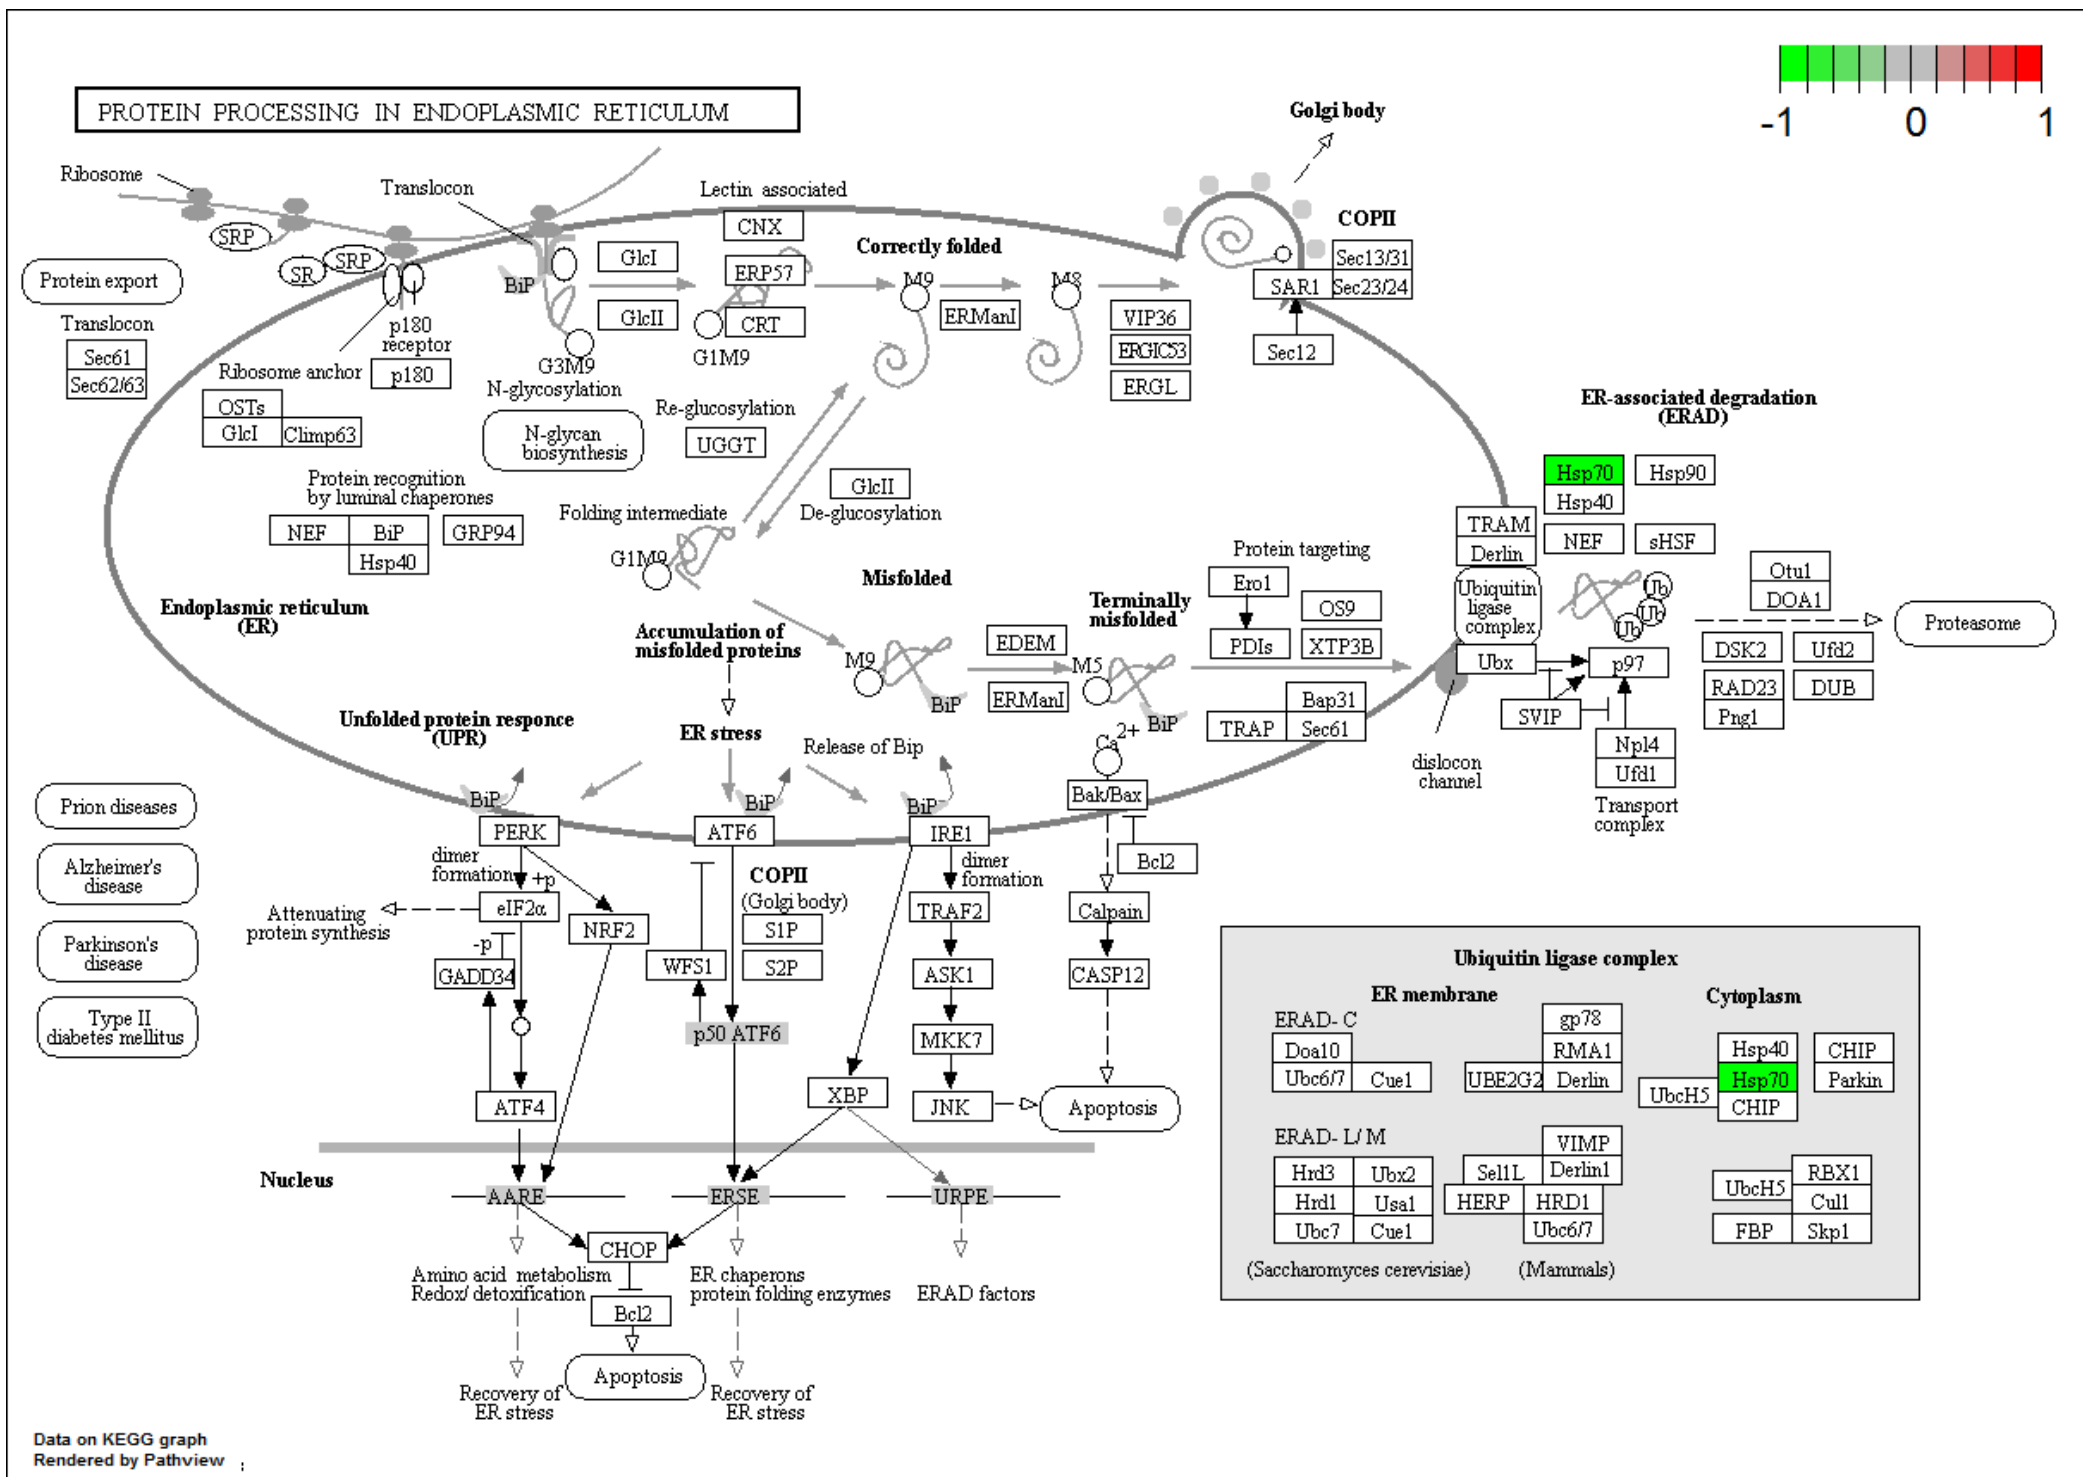



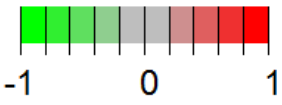

**ENDOCYTOSIS**

**Clathrin-dependent endocytosis**

**Clathrin-independent endocytosis**

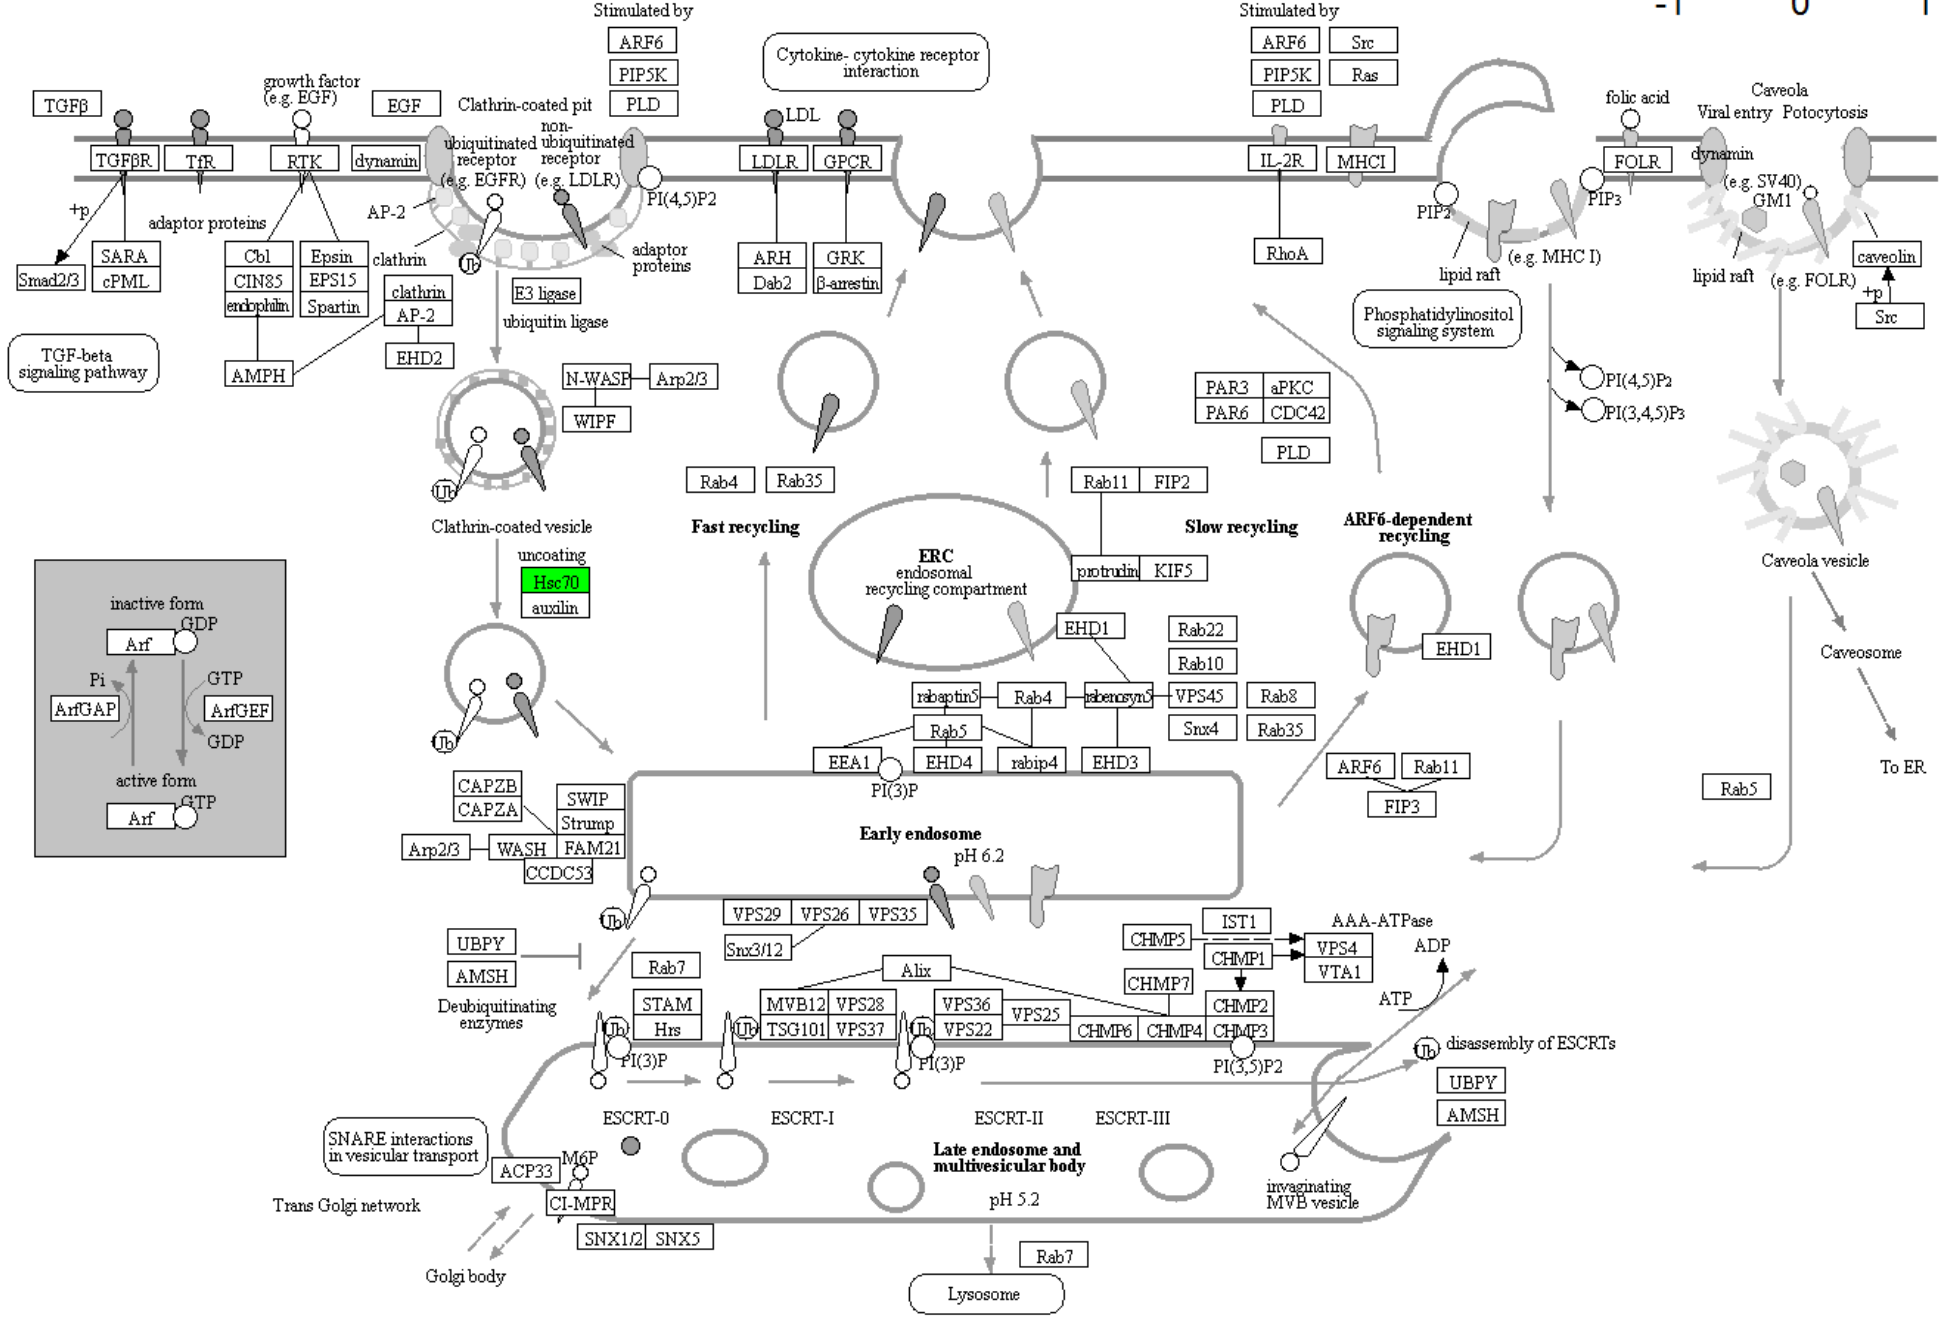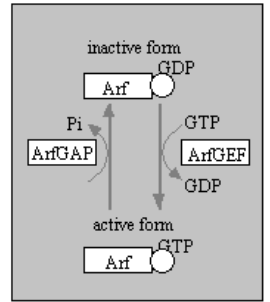

# mTOR SIGNALING PATHWAY

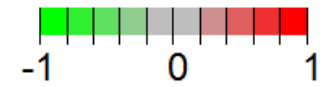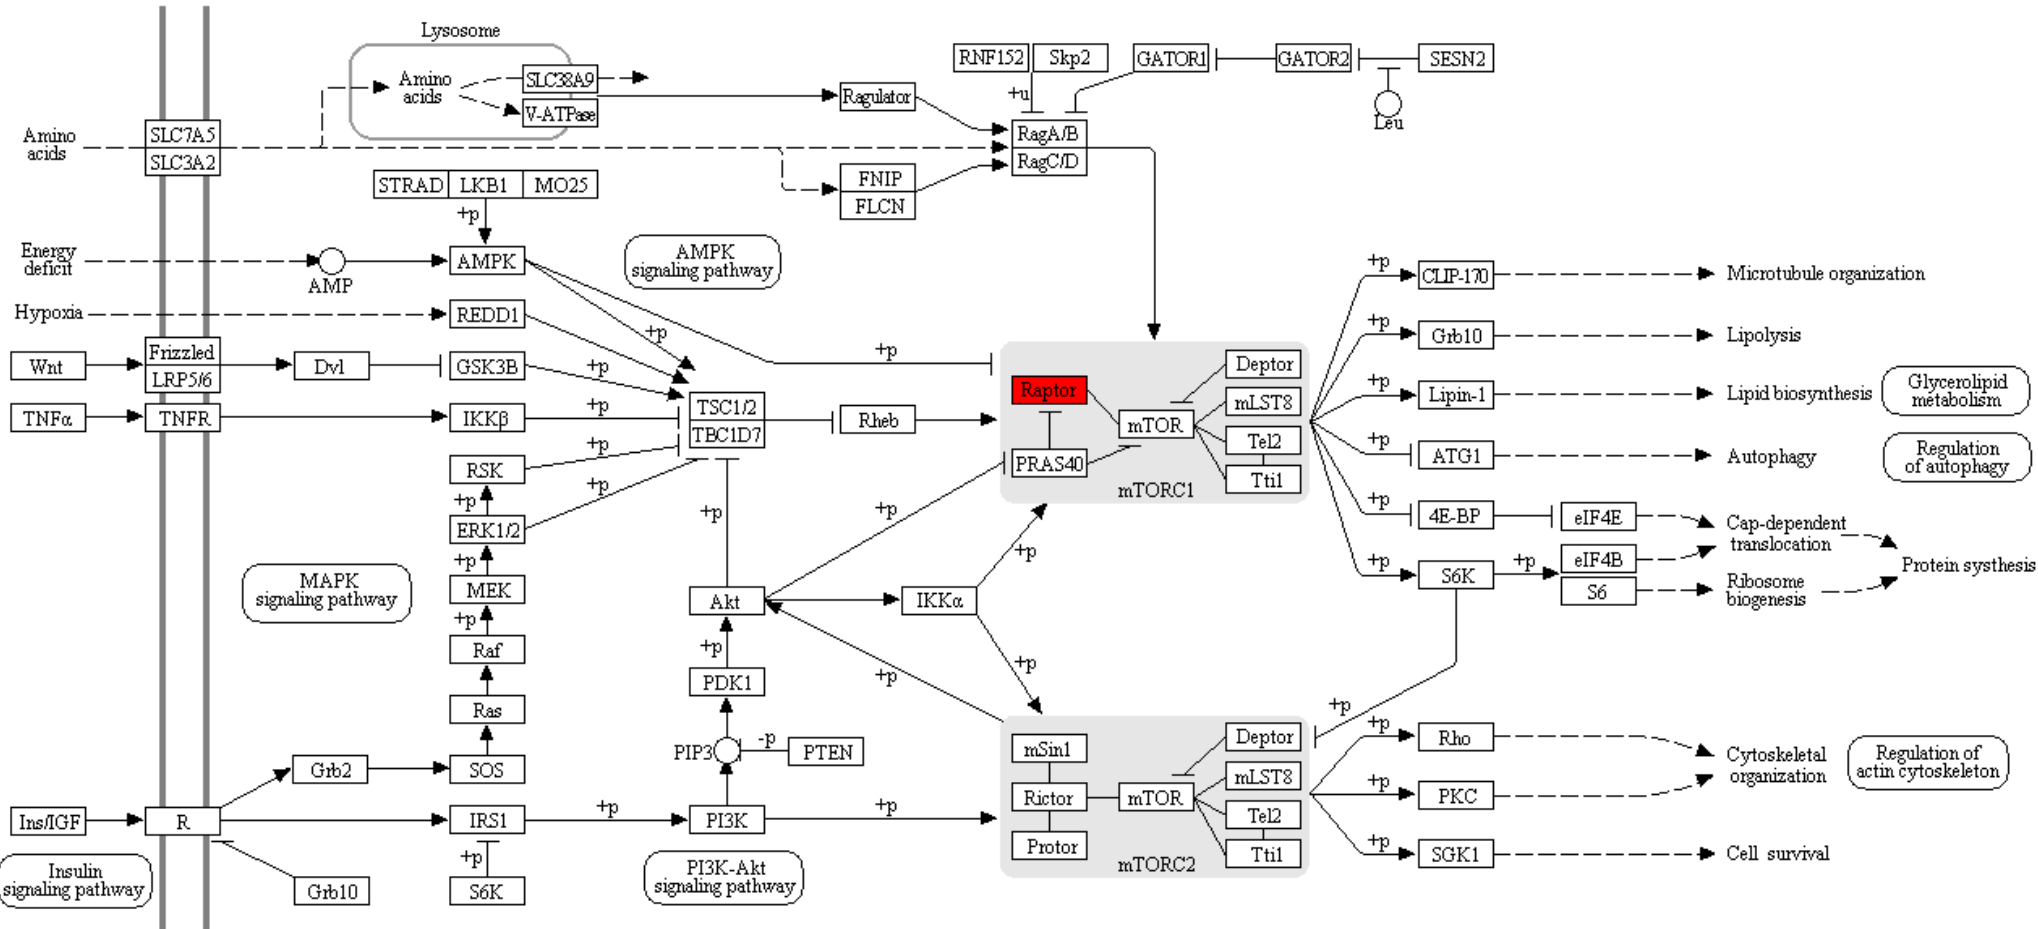

Data on KEGG graph  
Rendered by Pathview ;

LONGEVITY REGULATING PATHWAY - MULTIPLE SPECIES

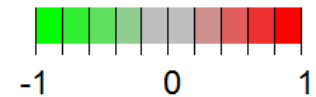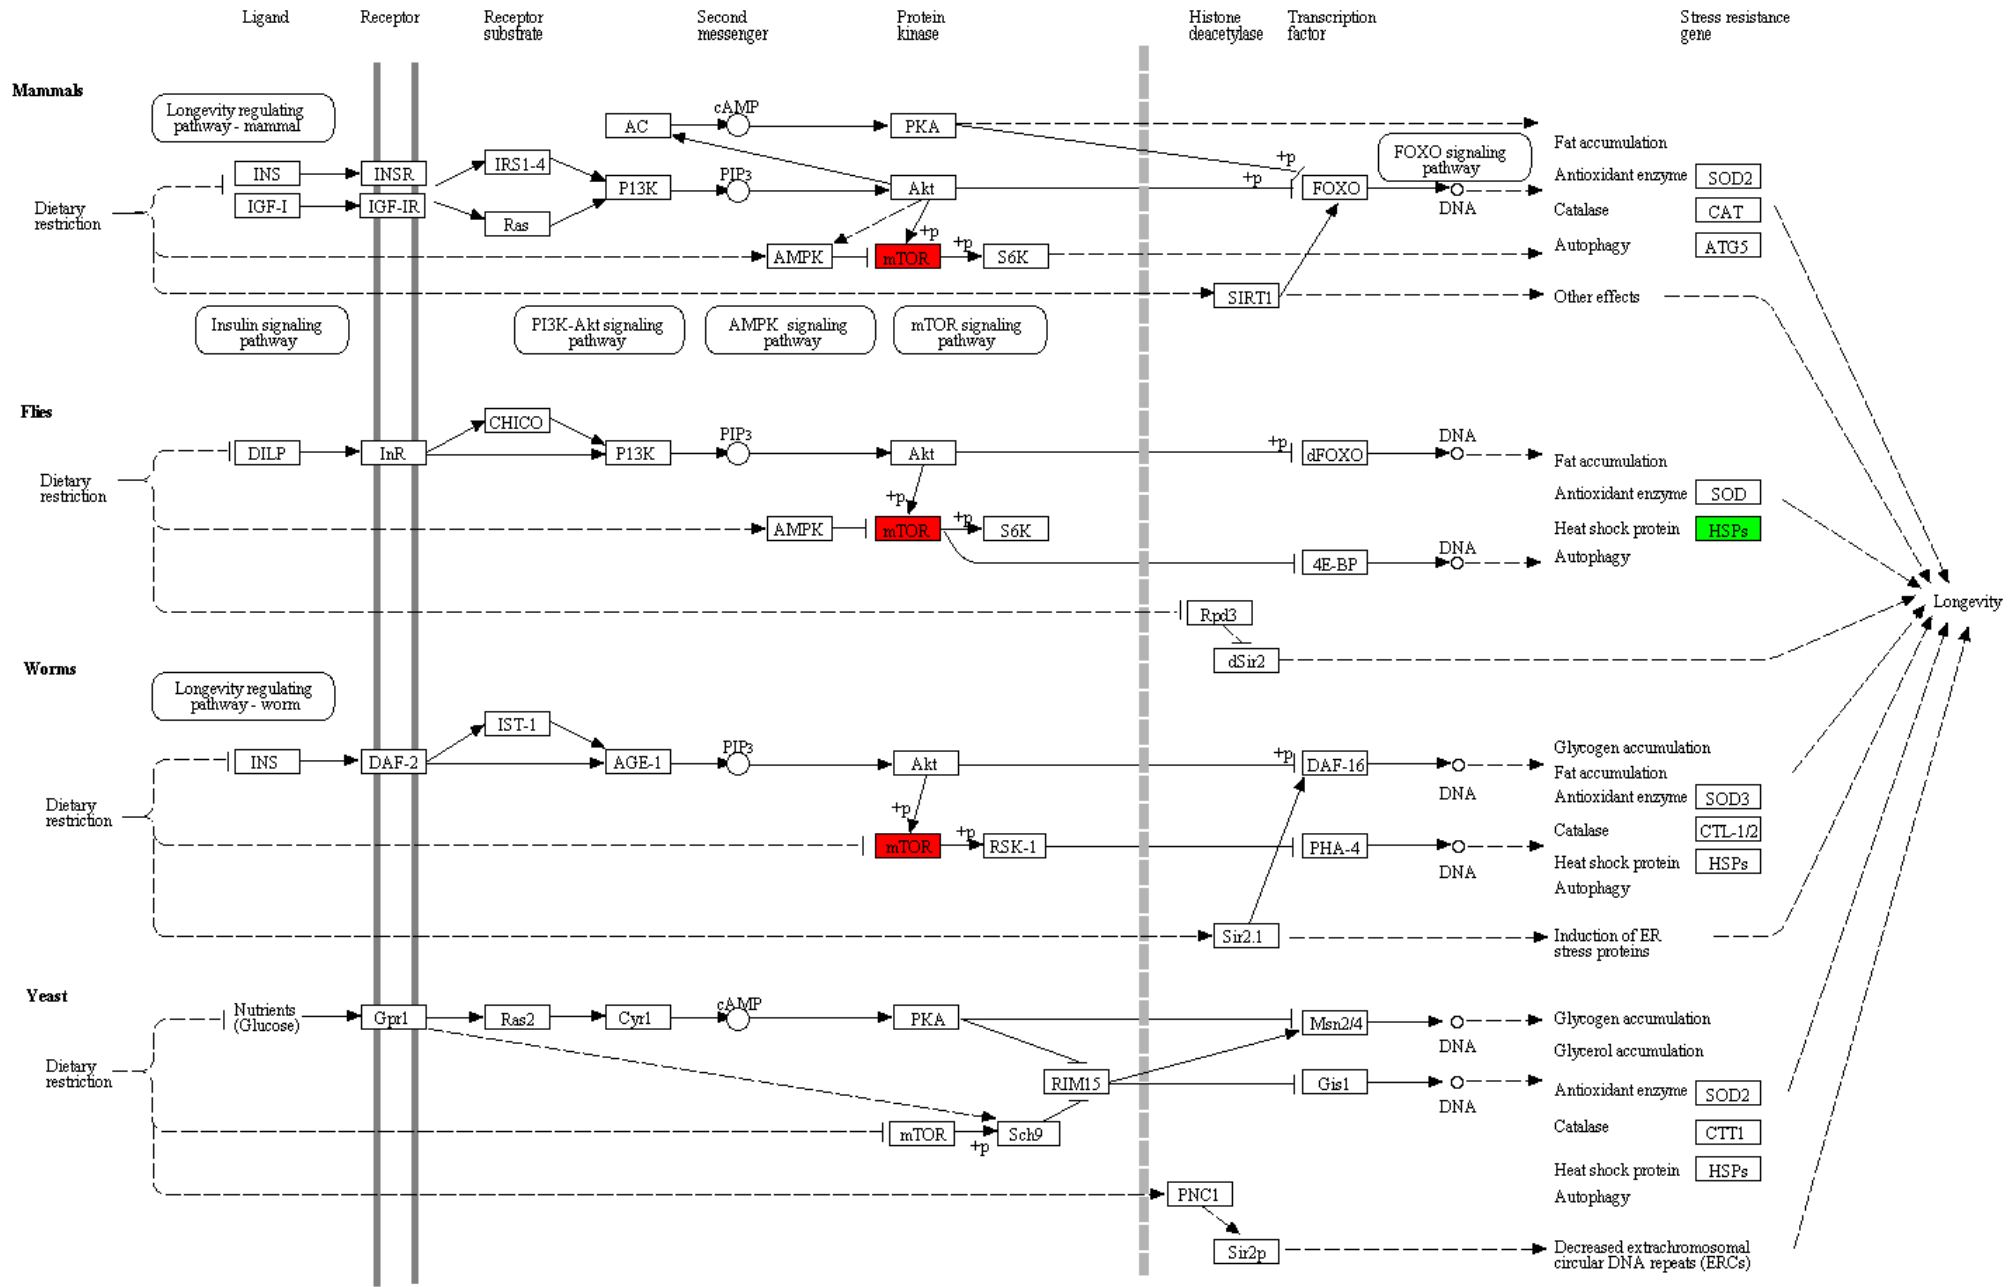

Data on KEGG graph  
Rendered by Pathview

APOPTOSIS - FLY

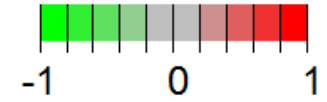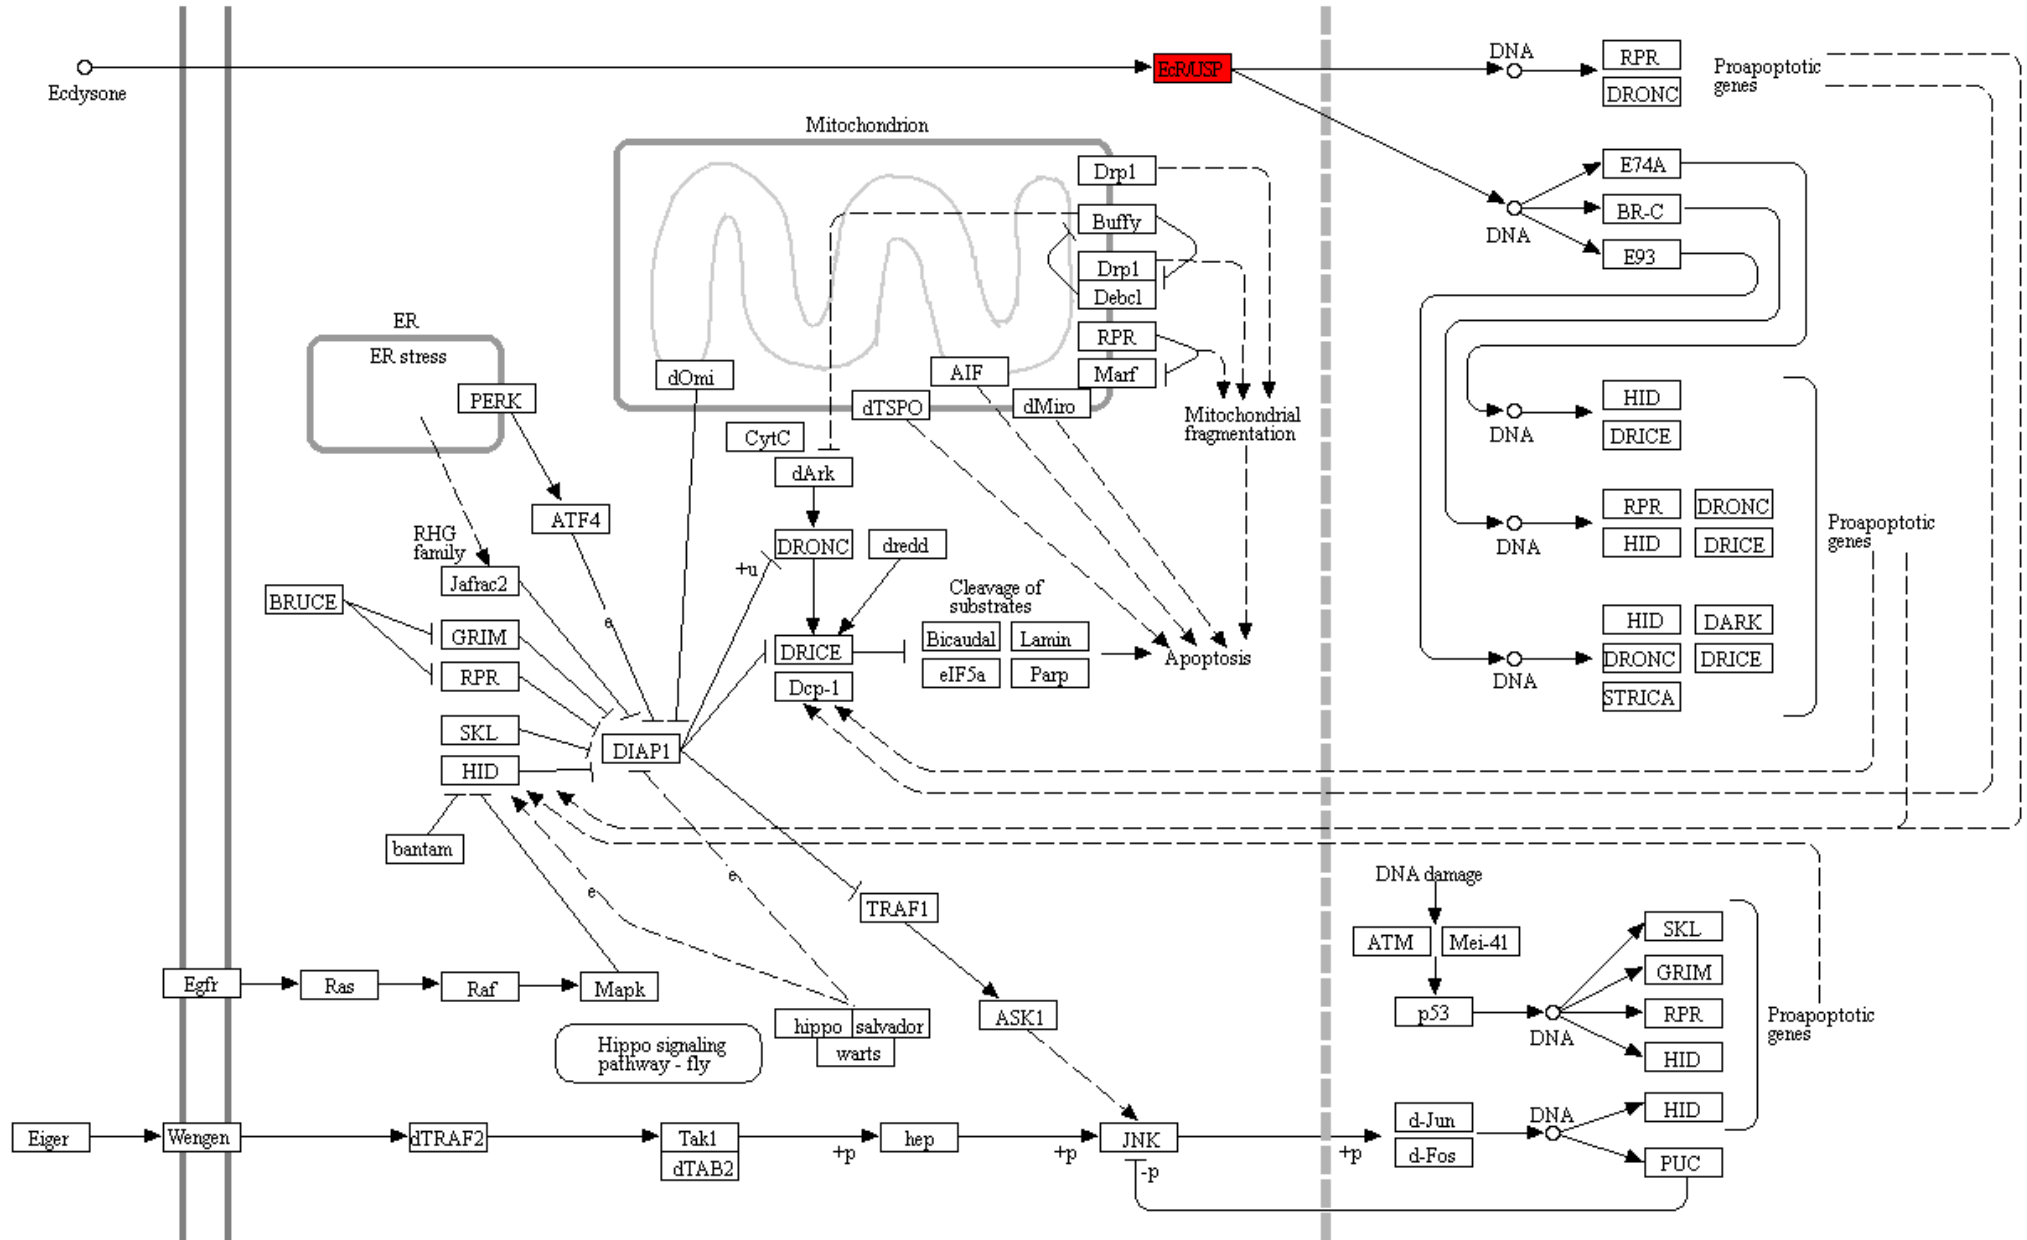

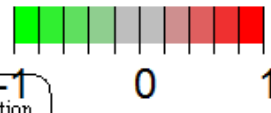

**WNT SIGNALING PATHWAY**

**Canonical pathway**

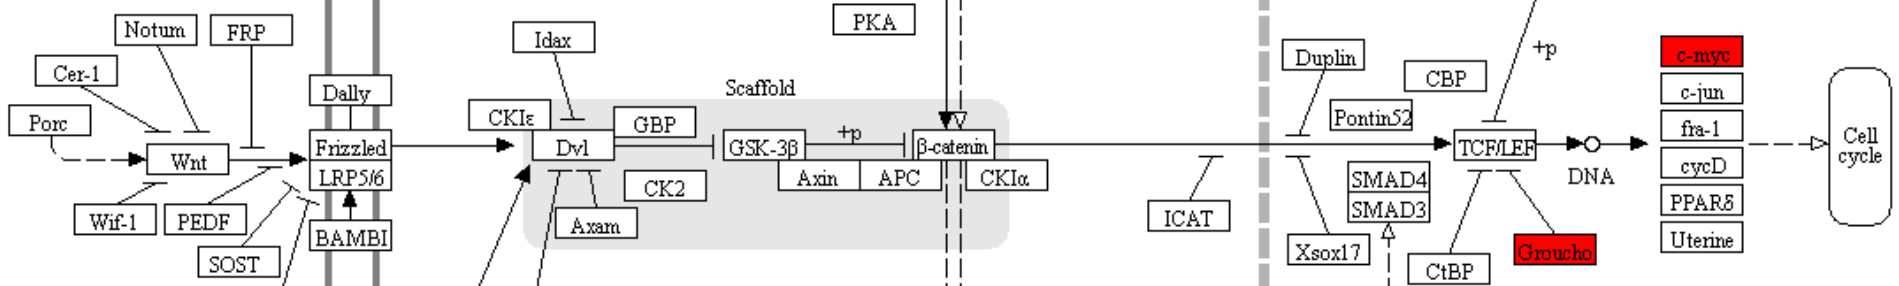

Alzheimer's disease

MAPK signaling pathway

Adherens junction

**Planar cell polarity (PCP) pathway**

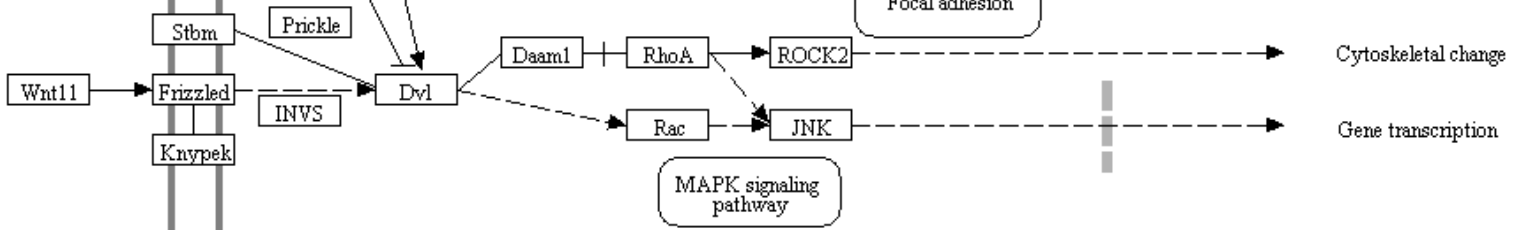

Focal adhesion

Cytoskeletal change

Gene transcription

**Wnt/ Ca<sup>2+</sup> pathway**

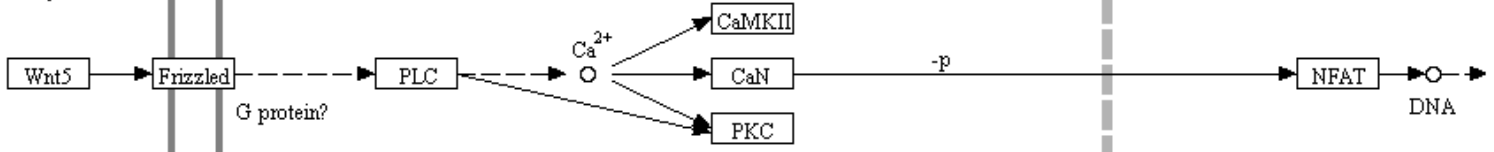

DNA

# DORSO-VENTRAL AXIS FORMATION (Grk/Egfr)

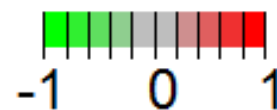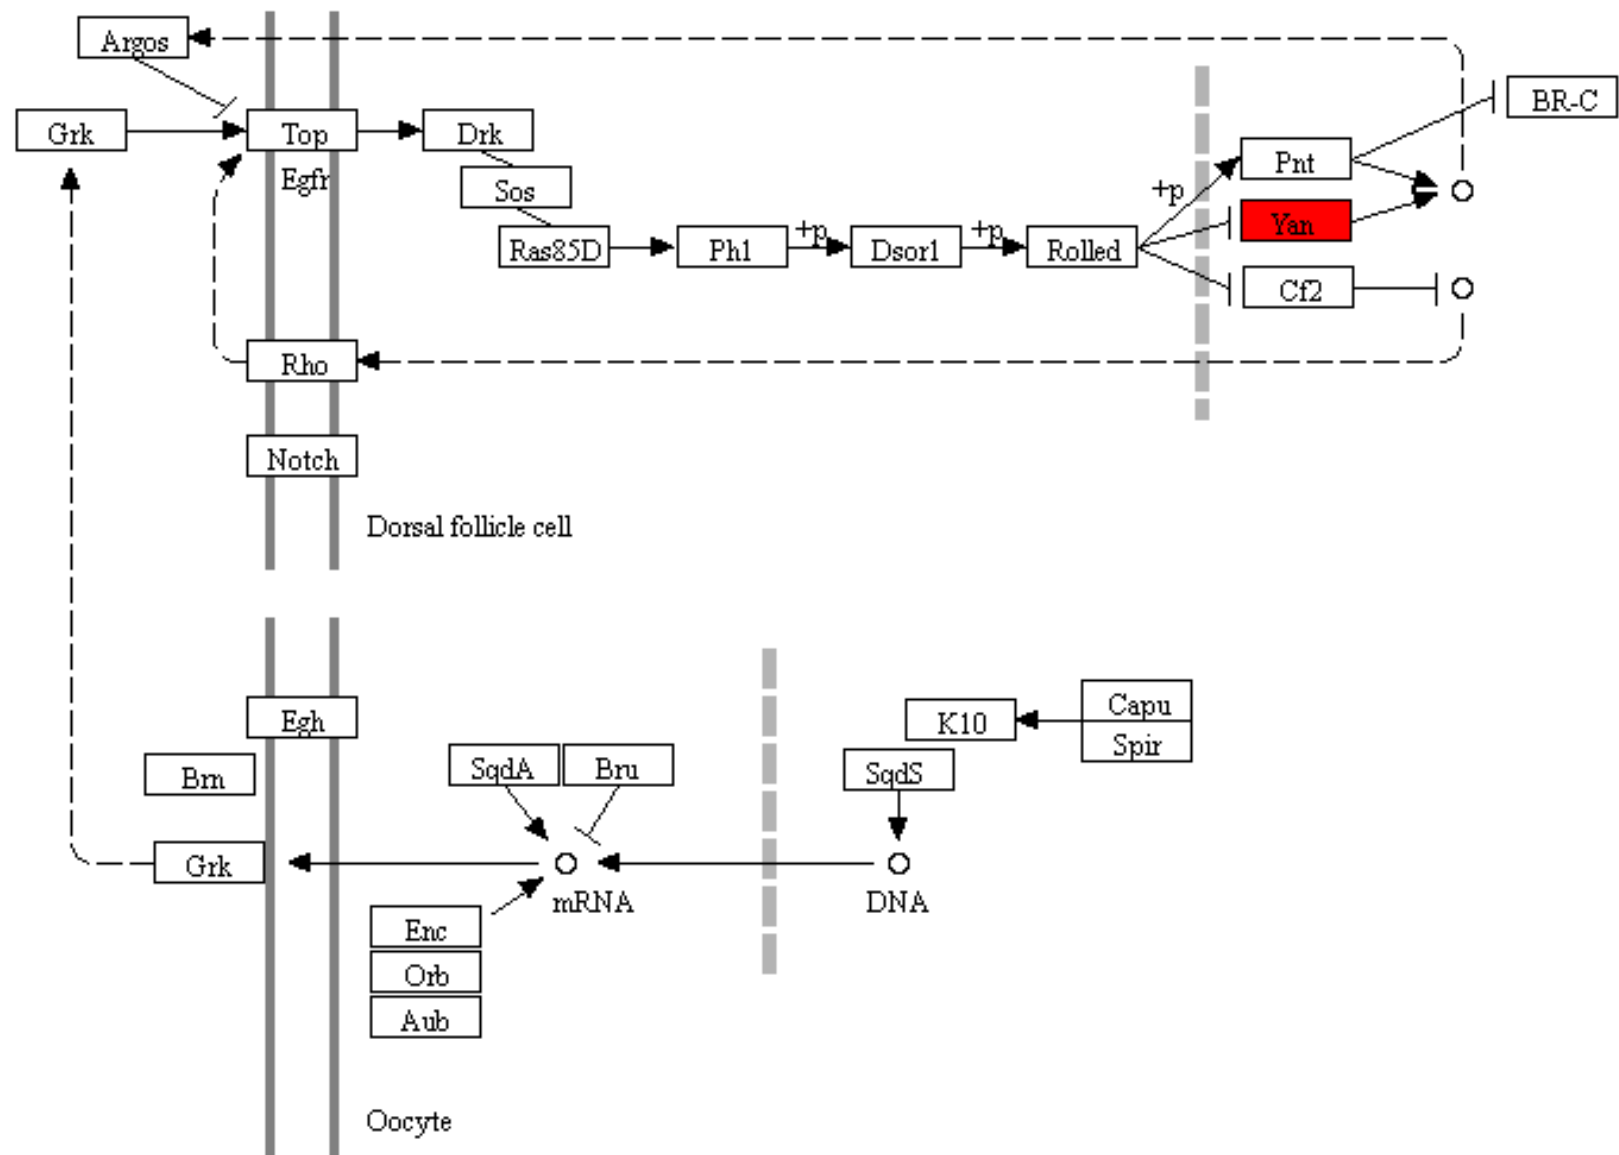

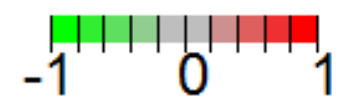

NOTCH SIGNALING PATHWAY

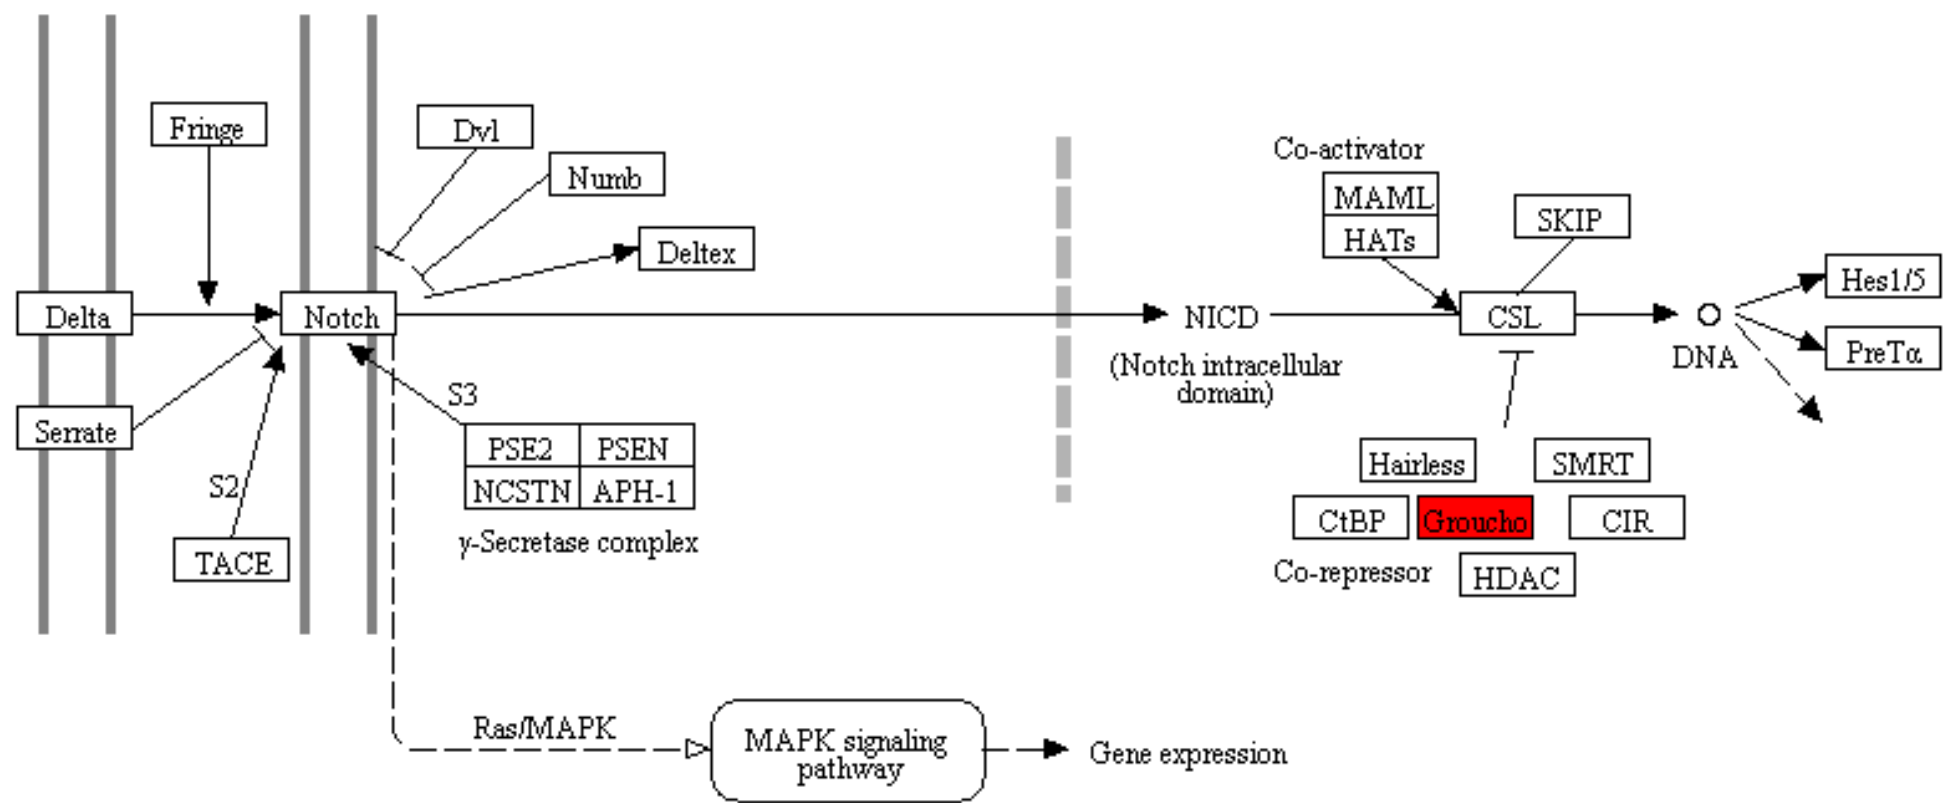

Data on KEGG graph  
 Rendered by Pathview ;

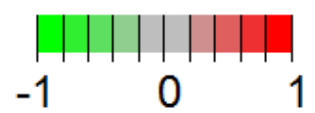

**TGF-BETA SIGNALING PATHWAY**

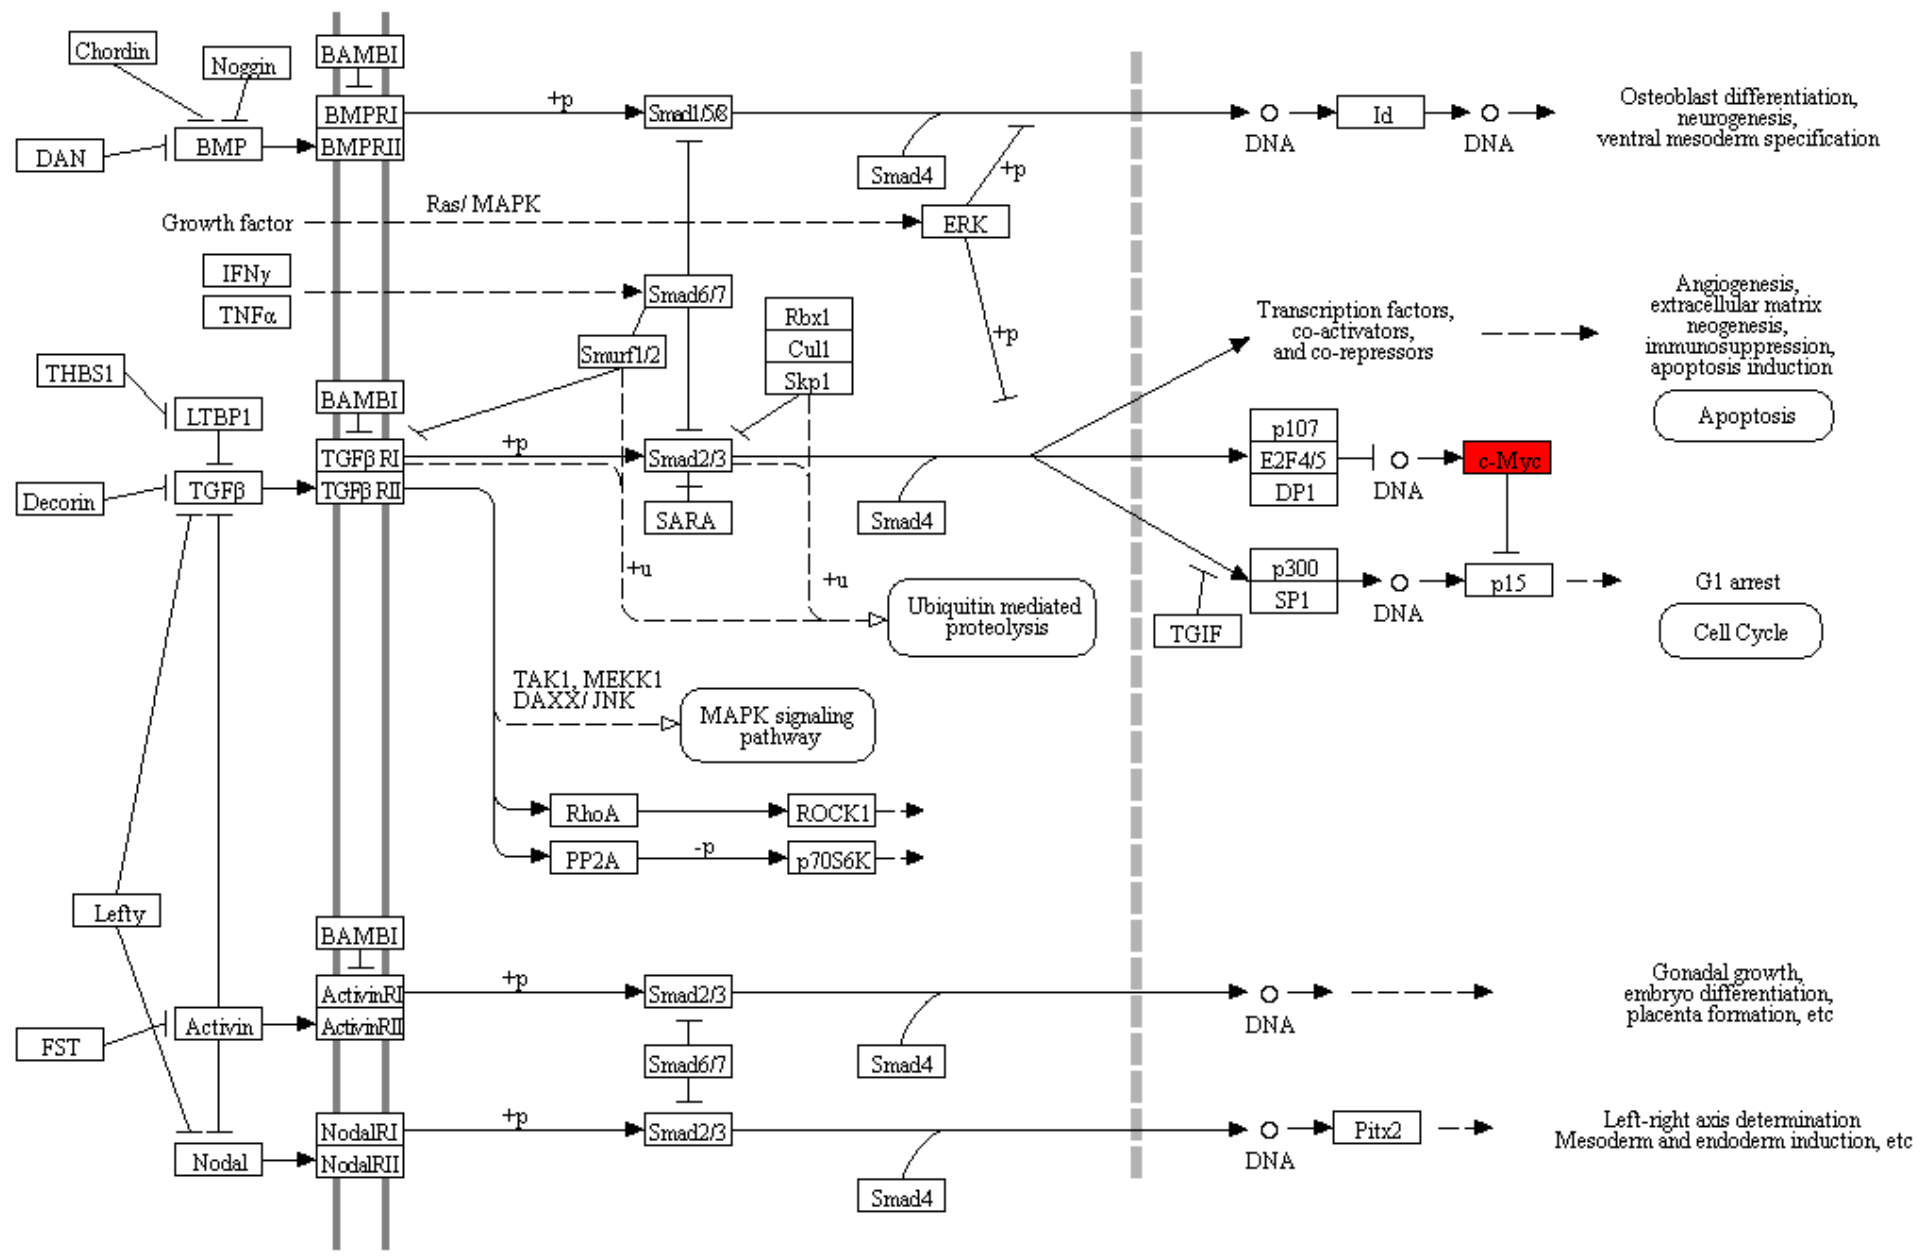

Data on KEGG graph  
Rendered by Pathview



HIPPO SIGNALING PATHWAY - FLY

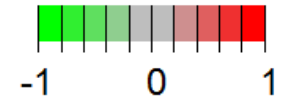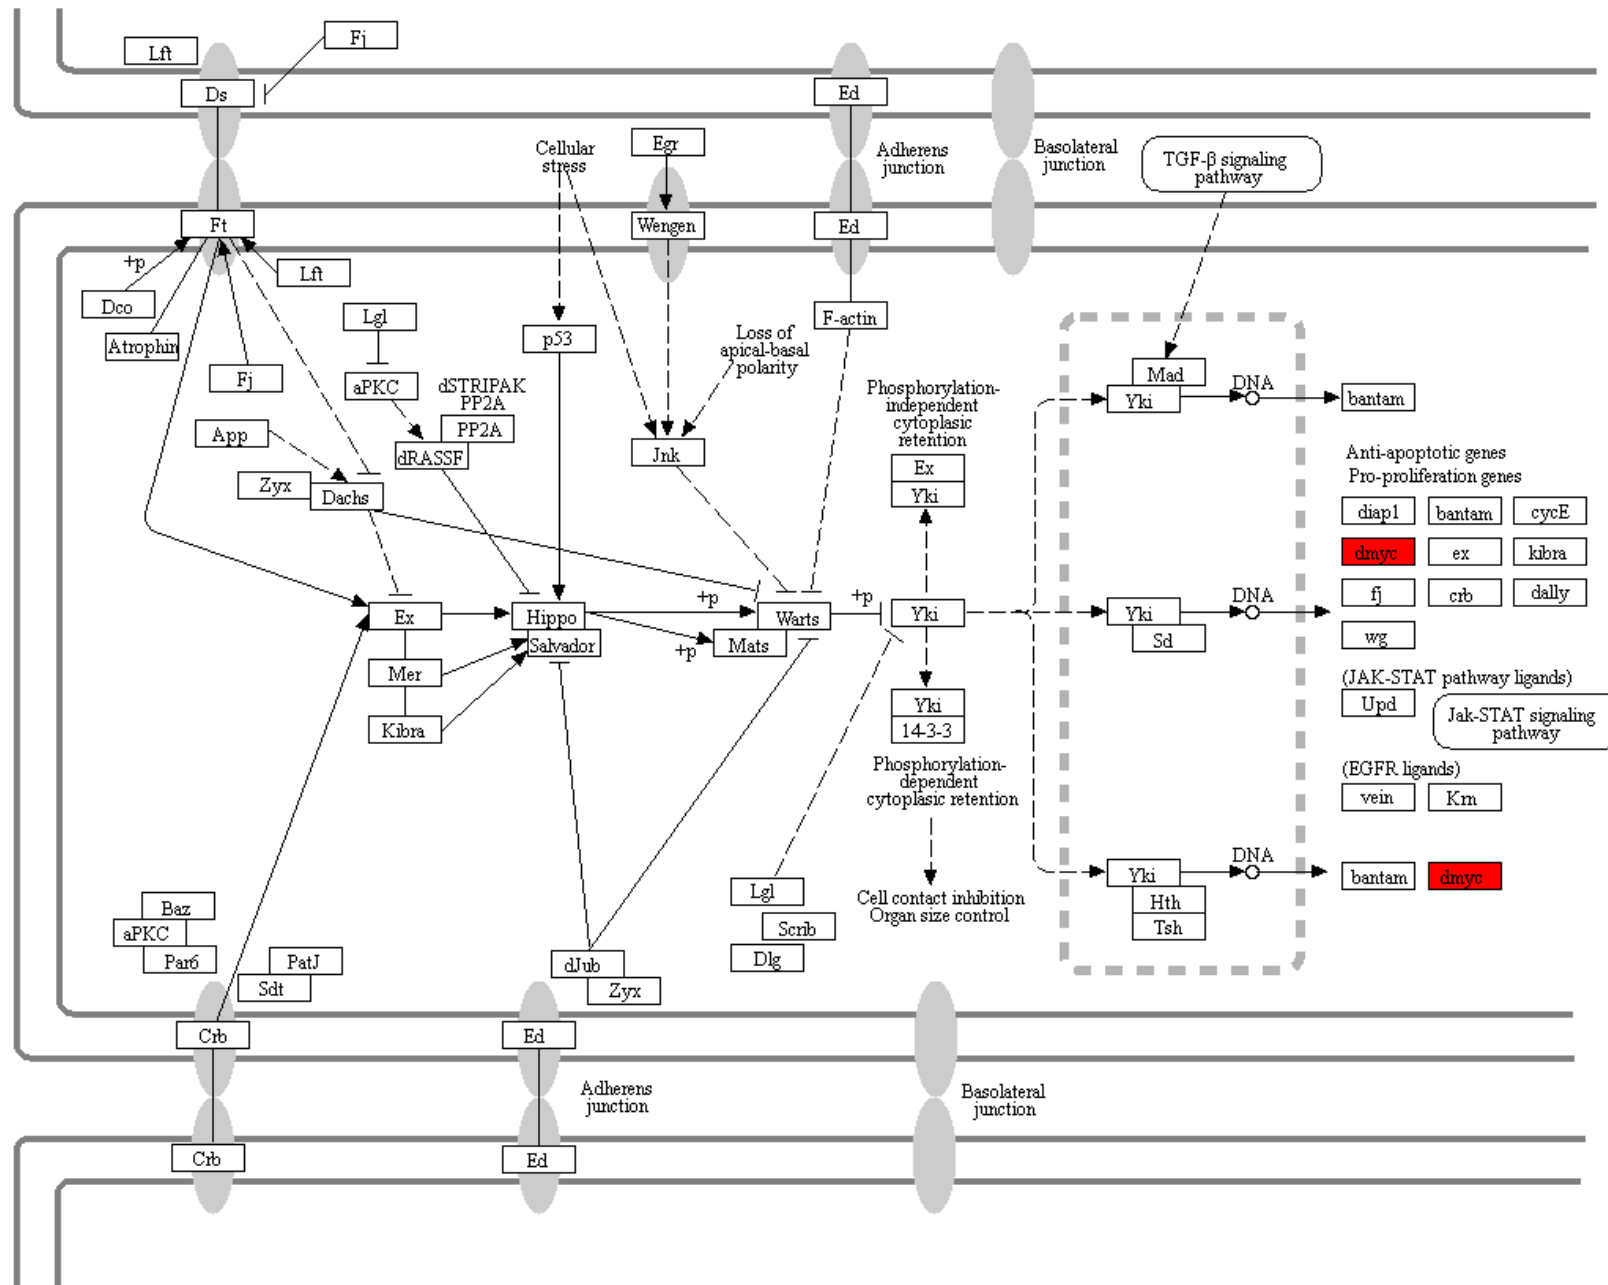

- | Anti-apoptotic genes       |             |       |
|----------------------------|-------------|-------|
| Pro-proliferation genes    |             |       |
| diap1                      | bantam      | cycE  |
| <b>dmyc</b>                | ex          | kibra |
| fj                         | crb         | dally |
| wg                         |             |       |
| (JAK-STAT pathway ligands) |             |       |
| Upd                        |             |       |
| (EGFR ligands)             |             |       |
| vein                       | Km          |       |
| bantam                     | <b>dmyc</b> |       |
